1                                   **The spermidine acetyltransferase SpeG**  
2                                   **regulates transcription of the small RNA RprA**

3  
4                   **Linda I. Hu<sup>1,#a¶</sup>, Ekaterina V. Filippova<sup>2,#b¶</sup>, Joseph Dang<sup>3</sup>, Sergii**  
5                   **Pshenychnyi<sup>4</sup>, Jiapeng Ruan<sup>2,#c</sup>, Olga Kiryukhina<sup>2</sup>, Wayne F. Anderson<sup>2</sup>,**  
6                   **Misty L. Kuhn<sup>3</sup>, and Alan J. Wolfe<sup>1\*</sup>**

7  
8    <sup>1</sup> Department of Microbiology and Immunology, Loyola University Chicago,  
9    Health Sciences Division, Stritch School of Medicine, Maywood, IL 60153, USA

10   <sup>2</sup> Center for Structural Genomics of Infectious Diseases, Northwestern University  
11   Feinberg School of Medicine, Department of Biochemistry and Molecular  
12   Genetics, Chicago, IL 60611, USA

13   <sup>3</sup> Department of Chemistry and Biochemistry, San Francisco State University,  
14   San Francisco, CA 94132, USA

15   <sup>4</sup> Recombinant Protein Production Core at Chemistry of Life Processes Institute,  
16   Northwestern University, Chicago, IL 60208, USA

17  
18   <sup>#a</sup> Current address: Department of Microbiology-Immunology, Feinberg School of  
19   Medicine, Northwestern University, Chicago, IL 60611, USA

20   <sup>#b</sup> Current address: Department of Biochemistry and Molecular Biology, Knapp  
21   Center for Biomedical Discovery, University of Chicago, Chicago, IL 60637, USA

22   <sup>#c</sup> Current address: Yale University School of Medicine, Department of Digestive  
23   Diseases, New Haven, CT 06510, USA

24 ¶ These authors contributed equally to this work

25

26 \* Corresponding author

27 Alan J. Wolfe E-mail: [awolfe@luc.edu](mailto:awolfe@luc.edu)

## 28 **Abstract**

29 Spermidine *N*-acetyltransferase (SpeG) acetylates and thus neutralizes toxic  
30 polyamines. Studies indicate that SpeG plays an important role in virulence and  
31 pathogenicity of many bacteria, which have evolved SpeG-dependent strategies  
32 to control polyamine concentrations and survive in their hosts. In *Escherichia coli*,  
33 the two-component response regulator RcsB is reported to be subject to N<sup>ε</sup>-  
34 acetylation on several lysine residues, resulting in reduced DNA binding affinity  
35 and reduced transcription of the small RNA *rprA*; however, the physiological  
36 acetylation mechanism responsible for this behavior has not been fully determined.  
37 Here, we performed an acetyltransferase screen and found that SpeG inhibits *rprA*  
38 promoter activity in an acetylation-independent manner. Surface plasmon  
39 resonance analysis revealed that SpeG can physically interact with the DNA-  
40 binding carboxyl domain of RcsB. We hypothesize that SpeG interacts with the  
41 DNA-binding domain of RcsB and that this interaction might be responsible for  
42 SpeG-dependent inhibition of RcsB-dependent *rprA* transcription. This work  
43 provides a model for SpeG as a modulator of *E. coli* transcription through its ability  
44 to interact with the transcription factor RcsB. This is the first study to provide  
45 evidence that an enzyme involved in polyamine metabolism can influence the  
46 function of the global regulator RcsB, which integrates information concerning  
47 envelope stresses and central metabolic status to regulate diverse behaviors.

## 48 Introduction

49 SpeG, a member of the Gcn5-related *N*-acetyltransferase (GNAT) family, is a  
50 bacterial spermidine *N*-acetyltransferase that acetylates spermidine and spermine.  
51 These polyamines are toxic to bacteria at high concentrations and acetylation  
52 neutralizes this toxicity [1, 2]. Studies indicate that SpeG plays an important role in  
53 virulence and pathogenicity of many bacteria, which have evolved SpeG-  
54 dependent strategies to control polyamine concentrations and survive in their hosts  
55 [3-6]. Kinetic and structural analyses have demonstrated that SpeG from both  
56 *Escherichia coli* and *Vibrio cholerae* can acetylate spermidine [7-9]. These studies  
57 also showed that SpeG from *V. cholerae* is an allosteric protein; when spermidine  
58 binds to its allosteric site, SpeG exhibits a symmetric closed dodecameric structure  
59 [7, 9]. Finally, in the absence of spermidine binding, *V. cholerae* SpeG can adopt  
60 a unique asymmetric dodecameric structure with an open conformational state  
61 [10].

62 During the course of this study, we found that SpeG also regulates the small  
63 RNA *rprA*, whose transcription strictly requires the phosphorylated isoform of the  
64 two-component response regulator RcsB [11, 12]. The canonical two-component  
65 signal transduction system is composed of two proteins. The first is a sensor  
66 kinase that detects a signal and, in response, autophosphorylates a conserved  
67 histidine residue using ATP as the phosphoryl donor. The second is a response  
68 regulator that autophosphorylates a conserved aspartate residue using the  
69 phosphorylated sensor kinase as the phosphoryl donor [for reviews, see [13-15]].  
70 A more complex variant of the basic two-component system is the phosphorelay,

71 such as the Rcs phosphorelay, which consists of five proteins (RcsC, RcsD, RcsF,  
72 IgaA, and RcsB). The first four proteins are involved in controlling the  
73 phosphorylation status of the response regulator RcsB in response to diverse  
74 extracytoplasmic stimuli. The phosphorylation status of RcsB is set by an ATP-  
75 dependent protein-protein interaction chain whose core consists of the cytoplasmic  
76 membrane-associated sensor kinase/phosphatase RcsC and its cognate histidine  
77 phosphotransferase RcsD [16]. The inner membrane protein IgaA favors RcsC  
78 phosphatase activity and thus dephosphorylation of RcsB. Relocation of the outer  
79 membrane lipoprotein RcsF to the periplasm favors RcsC kinase activity and thus  
80 phosphorylation of RcsB. This occurs when RcsF interacts with the C-terminal  
81 periplasmic domain of IgaA. Together, RcsF and IgaA regulate the activities of the  
82 Rcs phosphorelay components [17-24]. RcsB also can become phosphorylated in  
83 response to central metabolic changes via the central metabolite acetyl phosphate  
84 [25]. Both mechanisms (RcsC-dependent and acetyl phosphate-dependent)  
85 regulate the phosphorylation status of RcsB and thus both control RcsB-dependent  
86 processes, such as desiccation, flagellar biogenesis, capsule biosynthesis, and  
87 cell division [16, 25-28].

88 The Rcs phosphorelay is unusual, as the response regulator RcsB can form  
89 both a homodimer and a variety of heterodimers. The homodimer activates  
90 transcription of *rprA* [11, 12, 29], which encodes the small RNA regulator of the  
91 stationary phase sigma factor RpoS, and represses transcription of *flhDC*, which  
92 encodes the master regulator of the flagellar regulon [25, 30, 31]. To activate  
93 synthesis of the capsular exopolysaccharide colanic acid, RcsB forms a complex

94 with a partner transcription regulator, RcsA, stabilizing the interaction between  
95 RcsB and a specific DNA binding site, the “RcsAB box” [32, 33]. RcsB also can  
96 form protein-protein complexes with other partner transcription factors, including  
97 GadE, RmpA, MatA, BglJ, and RflM; there is also evidence to suggest an  
98 interaction with PhoP [34-39]. Because these protein-protein complexes form in  
99 response to a variety of conditions, the Rcs system can mediate diverse responses  
100 that contribute to biofilm formation, virulence, motility and antibiotic resistance in  
101 pathogens [26-28, 34-36].

102 Biochemical and mass spectrometry analyses indicate that RcsB can become  
103 N<sup>ε</sup>-lysine acetylated on multiple residues [29, 40-42]. Two mechanisms for N<sup>ε</sup>-  
104 lysine acetylation have been reported. One mechanism involves the direct  
105 donation of the acetyl group from acetyl phosphate to a deprotonated lysine ε-  
106 amino group [41, 43]. The other mechanism is enzymatic, relying on a lysine  
107 acetyltransferase (KAT) to catalyze donation of the acetyl group from acetyl-  
108 coenzyme A (acCoA) to the ε-amino group of a lysine residue [44]. All known  
109 bacterial KATs are members of the large family of GNATs [29, 40, 44-47].

110 One of our previous studies suggested that acetylation of RcsB diminished its  
111 ability to activate *rprA* transcription in *E. coli* [29]. In an effort to identify a KAT that  
112 might be responsible, we first screened 21 known *E. coli* genes that encode or are  
113 predicted to encode GNATs, seeking those that inhibited *rprA* transcription. This  
114 screen revealed that SpeG could inhibit *rprA* activity; however, we obtained no  
115 evidence that SpeG functions as a RcsB lysine N<sup>ε</sup>-acetyltransferase. Instead, we  
116 report here that SpeG can interact with RcsB through the latter’s DNA binding

117 domain. Our findings represent the first evidence that the metabolic enzyme SpeG  
118 can affect transcription by interacting with the response regulator RcsB.

119

## 120 **Results**

### 121 **SpeG regulates *rprA* promoter activity**

122 While the GNAT YfiQ (also known as Pka and PatZ) can acetylate RcsB *in vitro*  
123 [29, 40], the *yfiQ* mutant does not affect RcsB acetylation [29]. Therefore, we  
124 suspected another GNAT was responsible for RcsB acetylation and proceeded to  
125 test a series of 21 known or putative GNATs. We overexpressed these GNATs and  
126 measured their effect on *PrprA-lacZ*, a transcriptional fusion of the RcsB-  
127 dependent *rprA* promoter (*PrprA*) and the *lacZ* gene, which we had integrated as  
128 a single copy into the chromosome of BW25113 to generate our reference strain  
129 AJW3759 (**Table 1**) [12]. From this preliminary screen, we identified SpeG as an  
130 inhibitor of *PrprA* activity. When SpeG was overexpressed from a plasmid in the  
131 reference strain, *PrprA* activity was reduced compared to the vector control during  
132 late exponential growth and during the transition into early stationary phase (OD >  
133 1.0, **Fig 1A**, linear regression analysis  $t=-2.553$ ,  $p=0.01472$ ). When *speG* was  
134 deleted, *PrprA* activity increased in the isogenic *speG* mutant compared to its wild-  
135 type parent (**Fig 1B**, linear regression analysis  $t=7.750$ ,  $p= 8.65E-12$ ). Based on  
136 these results, we conclude that SpeG inhibits transcription from *PrprA*.

137 **Table 1. Bacterial strains, bacteriophage, plasmids, and primers used in this study.**

| Strain, phage, plasmid, or primer | Relevant Characteristic                                                                                           | Source/Reference                                                      |
|-----------------------------------|-------------------------------------------------------------------------------------------------------------------|-----------------------------------------------------------------------|
| Strains                           |                                                                                                                   |                                                                       |
| BW25113                           | F <sup>-</sup> $\lambda$ - $\Delta(araD-araB)567 \Delta(rhaD-rhaB)568 \Delta lacZ4787 rrnB3 rph-1 hsdR514$        | [48]                                                                  |
| AJW3759                           | BW25113 $\lambda\Phi(P_{rprA142-lacZ})$                                                                           | $\lambda$ : $\lambda_{rprA142} \rightarrow$ BW25113                   |
| AJW4589                           | AJW3759 $\Delta speG::FRT$                                                                                        | P1: JW1576 [49] $\rightarrow$ AJW3759, then removed antibiotic marker |
| AJW4533                           | AJW3759 $\Delta speE::FRT$                                                                                        | P1: JW0117 [49] $\rightarrow$ AJW3759, then removed antibiotic marker |
| BL21 (DE3) Magic                  | Competent cells; a derivative of BL21 cells carrying a plasmid encoding rare tRNAs; Kn <sup>R</sup>               | [50]                                                                  |
| Phage                             |                                                                                                                   |                                                                       |
| $\lambda_{rprA142}$               | $rprA142-lacZ$                                                                                                    | [12]                                                                  |
| Plasmids                          |                                                                                                                   |                                                                       |
| pCA24n                            | Control plasmid: Cm <sup>R</sup>                                                                                  | [51]                                                                  |
| pMCSG7                            | pET21 derivative for ligation independent cloning; adds N-terminal His tag and TEV cleavage site; Ap <sup>R</sup> | [52]                                                                  |
| pMCSG53                           | pET21 derivative for ligation independent cloning; adds N-terminal His tag and TEV cleavage site; Ap <sup>R</sup> | [53]                                                                  |
| pCA24n- <i>rscB</i>               | JW4054; IPTG-inducible His <sub>6</sub> -RcsB expression; Cm <sup>R</sup>                                         | [51]                                                                  |
| pCA24n- <i>speG</i>               | JW1576; IPTG-inducible His <sub>6</sub> -SpeG expression; Cm <sup>R</sup>                                         | [51]                                                                  |
| pCA24n- <i>speG</i> (Y135A)       | Site-directed mutagenesis of pCA24n- <i>speG</i> to carry an alanine at amino acid 135.                           | This study                                                            |
| pMCSG7- <i>rscB</i> (NTD)         | pMCSG7 expressing His <sub>6</sub> -RcsB (residues1-147); Ap <sup>R</sup>                                         | This study                                                            |



|                           |                                                                              |                   |
|---------------------------|------------------------------------------------------------------------------|-------------------|
| pMCSG7- <i>rcsB</i> (CTD) | pMCSG7 expressing His <sub>6</sub> -RcsB (residues 128-216); Ap <sup>R</sup> | This study<br>[7] |
| pMCSG53- <i>rcsA</i>      | pMCSG53 expressing His <sub>6</sub> -RcsA (residues 4-207); Ap <sup>R</sup>  |                   |
| pMCSG7- <i>speG</i>       | pMCSG7 expressing His <sub>6</sub> -SpeG; Ap <sup>R</sup>                    |                   |
| Primers (5'-3')           |                                                                              |                   |
| <i>rcsB</i> (CTD)_F       | AAGGAGATATACATATGCATCACCATCACCACCATAAATTCACA<br>CCGGAGAGCG                   | This study        |
| <i>rcsB</i> (CTD)_R       | AAGTACAGGTTCTCGGTACCTTATTAGTCTTTGTCCGCCGGAG<br>AC                            | This study        |
| <i>rcsB</i> (NTD)_F       | AAGGAGATATACATATGCACCATCATCACCACCATAACAACATG<br>AACGTTATTATCGCAGATGAC        | This study        |
| <i>rcsB</i> (NTD)_R       | AAGTACAGGTTCTCGGTACCTTATTAGCCATAGCCGCCTGCAG                                  | This study        |
| SDM <i>speGY135A</i>      | AAAGCCAAGCTTGCGGGCAATGTGAATCGCTTTTTTCATTCTCTT<br>TATCA                       | This study        |
| SDM <i>speGY135A</i> _as  | TGATAAAGAGAATGAAAAAGCGATTACATTGCCCGCAAGCTT<br>GGCTTT                         | This study        |

139 **Fig 1. The effect of SpeG on *rprA* promoter activity**

140 A. WT cells carrying the *PrprA-lacZ* fusion (AJW3759) were transformed with either  
141 a plasmid that expresses SpeG under the control of an IPTG-inducible promoter  
142 (*pspeG*; pCA24n-*speG*) or the vector control (VC; pCA24n) and grown in TB7  
143 containing 50  $\mu$ M IPTG to induce SpeG expression and chloramphenicol to  
144 maintain the plasmid. Cell growth and  $\beta$ -galactosidase activity were assayed at  
145 various points throughout growth. The values represent average promoter activity  
146 with standard deviations of triplicate independent cultures. Linear regression  
147 analysis of the experimental group WT/*pspeG* on *rprA* promoter activity versus  
148 WT/VC was statistically significant ( $t=-2.553$ ,  $p=0.01472$ ).

149 B. WT (AJW3759) and isogenic *speG* (AJW4589) strains were assayed for cell  
150 growth in TB7 and  $\beta$ -galactosidase activity. The values represent average  
151 promoter activity with standard deviations of five independent WT and *speG*  
152 cultures. Linear regression analysis of the experimental group *speG* on *rprA*  
153 promoter activity versus WT was statistically significant ( $t=7.750$ ,  $p=8.65E-12$ ).

154

155 **SpeG does not acetylate RcsB *in vitro***

156 Since SpeG belongs to the GNAT family of acetyltransferases known to  
157 acetylate proteins, we also tested the hypothesis that SpeG regulates *rprA*  
158 transcription by acetylating RcsB. To accomplish this, we used an *in vitro*  
159 colorimetric enzymatic assay with purified recombinant proteins. This assay  
160 measures the formation of product (CoA) indirectly via its reaction with  
161 dithionitrobenzoic acid (DTNB) to produce the thioanion product thionitrobenzoate

162 (TNB<sup>2-</sup>), which is monitored spectrophotometrically at 415 nm [7, 54]. We  
163 compared the acetylation activity of SpeG toward spermidine or RcsB. As  
164 predicted, we detected SpeG acetylation activity on spermidine when acCoA was  
165 present; however, we observed no change in RcsB acetylation status in the  
166 presence of SpeG and acCoA (**Fig 2**). This result suggests that RcsB is not a  
167 substrate for SpeG under the conditions we used to assay acetylation.

168

169 **Fig 2. *In vitro* acetylation activity of SpeG toward RcsB or spermidine.**

170 SpeG was incubated with either spermidine or RcsB in the presence of the acetyl  
171 donor acCoA to determine if SpeG uses both spermidine and RcsB as substrates.  
172 Control reactions of possible non-enzymatic acetylation of SpeG and RcsB via  
173 acCoA were also performed. See Materials and Methods for specific reaction  
174 conditions.

175

176 **Spermidine synthase (SpeE) is not required for SpeG-dependent inhibition**  
177 **of *rprA* transcription**

178 The spermidine synthase SpeE transfers a propylamine from decarboxylated  
179 S-adenosylmethionine to putrescine to form spermidine, which is both a substrate  
180 and an allosteric activator of SpeG [7]. To explore the role of SpeE/spermidine in  
181 SpeG overexpression-inhibited *PrprA* activity, we transformed a mutant that does  
182 not synthesize spermidine (*speE*) and its WT parent with either the SpeG  
183 overexpression plasmid or its vector control and monitored *PrprA* activity (**Fig 3**).  
184 SpeG overexpression resulted in reduced *PrprA* activity in both the parental strain  
185 (**Fig 3**, linear regression analysis  $t=-3.752$ ,  $p=0.000282$ ) and the *speE* mutant (**Fig**

186 **3**, linear regression analysis  $t=-3.470$ ,  $p=0.000745$ ). Furthermore, exposure of the  
187 *speE* mutant to exogenous spermidine exerted no effect on *PrprA* activity whether  
188 or not SpeG was overexpressed (**S1 Fig**). We conclude that SpeG can inhibit  
189 *PrprA* activity regardless of SpeE/spermidine status.

190

191 **Fig 3. The effect of overexpressing SpeG or SpeG(Y135A) in WT cells and**  
192 **overexpressing SpeG in the *speE* mutant on *rprA* promoter activity**

193 A. WT cells carrying the *PrprA-lacZ* fusion (AJW3759) were transformed with  
194 either *pspeG* (pCA24n-*speG*), *pspeG(Y135A)* (pCA24n-*speG(Y135A)*), or the VC  
195 (pCA24n) and grown in TB7 supplemented with 50  $\mu$ M IPTG and  
196 chloramphenicol to maintain the plasmid. Cell growth and  $\beta$ -galactosidase activity  
197 were assayed. The values represent average promoter activity with standard  
198 deviations of five independent cultures.

199 B. The isogenic *speE* mutant was transformed with either *pspeG* (pCA24n-*speG*)  
200 or the VC (pCA24n) and cell growth and  $\beta$ -galactosidase activity were assayed as  
201 described for 3A. The values represent average promoter activity with standard  
202 deviations of five independent cultures. Linear regression comparison results on  
203 *rprA* promoter activity were significant for all experimental groups: WT/*pspeG*  
204 versus WT/VC ( $t=-3.752$ ,  $p=0.000282$ ), WT/*pspeG(Y135A)* versus WT/VC  
205 ( $t= -2.456$ ,  $p=0.015623$ ), and *speE/pspeG* versus *speE/VC* ( $t=-3.470$ ,  
206  $p=0.000745$ ).

207

208

209 **Catalytic activity of SpeG is not required for SpeG-dependent inhibition of**  
210 ***rprA* transcription**

211 We next asked if SpeG overexpression-dependent inhibition of *PrprA* activity  
212 requires the spermidine acetyltransferase activity of SpeG. We therefore  
213 overexpressed SpeG Y135A, a predicted catalytically inactive SpeG variant, in the  
214 parent (AJW3759). This tyrosine (Y) residue acts as a general acid during  
215 substrate acetylation and has been shown to be critical for catalytic activity of many  
216 GNAT homologs [55-57]. We found that the SpeG Y135A mutant retained the  
217 ability to inhibit *PrprA* activity in the parent AJW3759 (**Fig 3A**, linear regression  
218 analysis  $t = -2.456$ ,  $p = 0.015623$ ). These results are consistent with a SpeG-  
219 dependent, but spermidine acetylation-independent mechanism of inhibition in WT  
220 cells.

221

222 **SpeG binds to RcsB through its C-terminal domain**

223 Since SpeG does not appear to acetylate RcsB and its catalytic activity is  
224 unnecessary for its ability to inhibit *rprA* transcription, we considered whether  
225 SpeG inhibits RcsB activity through a physical interaction. We used SPR to  
226 investigate whether SpeG and RcsB can form a complex. First, we immobilized  
227 SpeG onto the SPR chip and evaluated whether full-length RcsB or its N- or C-  
228 terminal domains could bind to SpeG. Both full-length RcsB (**Fig 4A**) and its C-  
229 terminal domain (**Fig 4B**) bound to immobilized SpeG in a concentration-  
230 dependent manner. In contrast, the N-terminal domain of RcsB did not (**Fig 4C**).  
231 These results suggest that RcsB binds to SpeG through its C-terminal domain. We

232 also performed the reverse experiment, assessing whether SpeG could bind to  
233 immobilized RcsB or its domains, but we detected no signal (data not shown).  
234 Perhaps RcsB binds to the chip in a manner that prevents interaction with SpeG.

235

#### 236 **Fig 4. SPR analysis of the SpeG-RcsB interaction**

237 The dose-response analysis for immobilized *E. coli* SpeG (46  $\mu\text{M}$ ) with increasing  
238 concentrations of full-length *E. coli* RcsB (21, 42, 53, 63 and 74  $\mu\text{M}$ ) as an analyte  
239 in the absence of spermidine (A) or RcsB (21, 42, 53, 63 and 74  $\mu\text{M}$ ) after exposure  
240 to 0.5 mM spermidine (D), RcsB C-terminal domain (45, 67, 91, 114, 136, and 159  
241  $\mu\text{M}$ ) in the absence of spermidine (B) or RcsB C-terminal domain (23, 45, 91, 114,  
242 and 136  $\mu\text{M}$ ) after exposure to 0.5 mM spermidine (E), and RcsB N-terminal  
243 domain (59, 118, and 176  $\mu\text{M}$ ) in the absence of spermidine (C) or RcsB N-terminal  
244 domain (59, 118, 177, 236 and 295  $\mu\text{M}$ ) after exposure to 0.5 mM spermidine (F).

245

246 We calculated a  $K_D$  of 67  $\mu\text{M}$  for the binding of SpeG to the RcsB C-terminal  
247 domain from the fit to a simple one-to-one binding model, in which one C-domain  
248 RcsB molecule interacts with one SpeG molecule (**S2A Fig**). However, we could  
249 not determine the  $K_D$  for the SpeG/full-length RcsB interaction, as the data did not  
250 fit either a simple binding model or other models defined in the SPR data analysis  
251 software program TraceDrawer. The lack of fitting for the SpeG/full-length RcsB  
252 interaction likely resulted from the pronounced peak at the beginning of the  
253 sensograms, which occurred especially with higher concentrations of RcsB.

254 We next tested the effect of spermidine on the SpeG-RcsB interaction. To  
255 accomplish this, we exposed the surface of the chip containing immobilized SpeG  
256 to spermidine and then measured the SPR signal from binding the three separate  
257 RcsB constructs (described in Materials and Methods; **Fig 4D-F**). By fitting the  
258 sensograms to these data using the one-to-one binding model, we obtained  $K_D$   
259 values of 128 and 281  $\mu\text{M}$  for the RcsB full-length and its C-terminal domain,  
260 respectively (**Fig S2B-C**). In contrast, we could not determine a  $K_D$  for the RcsB  
261 N-terminal domain due to a large chi-squared fitting value. Furthermore, we  
262 conclude that the binding of the N-terminal domain to SpeG is weak because the  
263 response signals obtained at concentrations greater than 100  $\mu\text{M}$  were relatively  
264 low (**Fig 4F**). On the basis of these data and those obtained in the absence of  
265 spermidine, we propose that SpeG interacts with the C-terminal domain of RcsB  
266 in the presence or absence of spermidine and that spermidine does not prevent  
267 RcsB binding to SpeG.

268

### 269 **Possible SpeG inhibition of LuxR/FixJ-like transcription factors**

270 SpeG inhibits *rprA* transcription and binds RcsB through the carboxyl terminal  
271 domain, which contains the conserved DNA binding helix-turn-helix (HTH) motif  
272 found in RcsB and other LuxR/FixJ-type proteins [16, 58]. Based on this result, it  
273 is tempting to speculate that SpeG may also bind other LuxR/FixJ family members.  
274 To identify conserved residues of the RcsB HTH motif across other LuxR/FixJ-like  
275 transcriptional regulators from *E. coli*, we used the PSI-BLAST server [59] to  
276 generate a list of DNA-binding domains from LuxR/FixJ-type family homologs and

277 the NMR structure of the RcsB C-terminal domain from *Erwinia amylovora*, a close  
278 relative of *E. coli* [32] to visualize sequence conservation with respect to the three-  
279 dimensional structure (**Fig 5**). We also generated a phylogenetic tree using these  
280 sequences to determine which RcsB homologs had the greatest sequence  
281 similarity to its C-terminal domain and, therefore, propensity for interacting with  
282 SpeG (**S3 Fig**). We found the most conserved RcsB C-terminal domain residues  
283 across LuxR/FixJ-type homologs are S152, P153, K154, L167, V168, T169, R177,  
284 S178, K180, T181, S183, S184, Q185, K186, K187, and D198. From our analysis,  
285 the *E. coli* LuxR/FixJ-type homolog sequences of YjjQ, BglJ, YahA, YuaB, DctR,  
286 and RcsA are most similar to the RcsB C-terminal DNA-binding domain and  
287 warrant further testing. We hypothesized that SpeG might bind RcsB through these  
288 critical residues in the C-terminal domain and potentially those of other homologs.  
289

290 **Fig 5. Structure analysis of the RcsB C-terminal DNA-binding domain**

291 Ribbon diagram of the RcsB C-terminal DNA-binding domain from *Erwinia*  
292 *amylovora* (top panel). Conserved residues involve in DNA contacts in known  
293 LuxR/FixJ regulators are shown as stick models. RcsB DNA-binding domain:  
294 sequence-structure alignment (bottom panel). Surface representation of the RcsB  
295 DNA-binding domain was colored by the degree of sequence conservation from  
296 red (100% conserved residues) to blue (non-conserved residues). A search for  
297 RcsB C-terminal DNA-binding domain homologs was done using the PSI-BLAST  
298 server. From the list of 500 sequences against the non-redundant database a  
299 random set of 30 sequences with identity from 98% to 40% were chosen. A multiple



300 sequence alignment for visualization of the sequence conservation with respect to  
301 the three-dimensional structure was generated.

302

### 303 **SpeG does not bind the LuxR/FixJ family member RcsA**

304 To determine if binding to SpeG is specific for RcsB or if SpeG can bind *in*  
305 *vitro* to other LuxR/FixJ transcriptional regulators that have C-terminal domains  
306 similar to RcsB, we heterologously expressed and purified the *E. coli* RcsA  
307 transcriptional regulator (an auxiliary partner with RcsB in a heterodimer that  
308 interacts with a specific DNA site called the “RcsAB” box [60]) and tested RcsA  
309 binding to SpeG by SPR. We found that SpeG does not bind to RcsA in the  
310 absence of spermidine (**S4 Fig**), which highlights the binding specificity between  
311 RcsB and SpeG. However, we cannot exclude that possibility that SpeG may  
312 bind an RcsB-RcsA heterodimer or other LuxR/FixJ-type family members in the  
313 presence or absence of spermidine. While RcsA has an HTH motif, its inability to  
314 bind SpeG also suggests that other regions of RcsB within its DNA-binding  
315 domain besides the HTH motif and/or its oligomeric state might be important for  
316 the specificity of the SpeG-RcsB interaction.

317

## 318 **Discussion**

319 We have presented evidence that the metabolic enzyme SpeG regulates  
320 transcription from the *rprA* promoter. We also have shown that SpeG binds the  
321 DNA binding domain of the transcription factor RcsB. We propose that this  
322 interaction interferes with the ability of RcsB to activate transcription from the *rprA*

323 promoter. This represents the first report of a direct link between spermidine  
324 metabolism and an envelope stress signal transduction pathway.

325

### 326 **SpeG can inhibit *rprA* transcription through interactions with RcsB**

327 We began this study because we had previously reported that N<sup>ε</sup>-lysine  
328 acetylation regulates RcsB activity at the *rprA* promoter [29]. Since deletion of the  
329 only known *E. coli* N<sup>ε</sup>-lysine acetyltransferase YfiQ had no obvious effect on the  
330 acetylation state of RcsB [29], we screened the known and putative  
331 acetyltransferases for regulators of *rprA* transcription and found that SpeG  
332 inhibited *rprA* promoter activity: overexpression of SpeG reduced *rprA* promoter  
333 activity (**Fig 1A**), while deleting *speG* relieved inhibition of the *rprA* promoter (**Fig**  
334 **1B**).

335 Because we did not observe acetylation of RcsB by SpeG (**Fig 2**) and since we  
336 did not find that SpeG activity could affect RcsB-dependent *rprA* inhibition (**Fig 3**),  
337 we instead investigated the possibility of a physical interaction between RcsB and  
338 SpeG. Indeed, SPR analysis showed that SpeG forms a complex with RcsB  
339 through the RcsB C-terminal DNA-binding domain (**Fig 4**). We further report that  
340 this interaction is specific, as we did not detect binding between SpeG and RcsB's  
341 auxiliary transcription factor RcsA (57) (**S3 and S4 Figs**). These *in vitro* results  
342 combined with the *in vivo* analysis support the hypothesis that SpeG and RcsB  
343 interact and that the resulting complex impacts RcsB activity at the *rprA* promoter.  
344 As *rprA* transcription absolutely requires RcsB, we did not test if SpeG affected  
345 *rprA* transcription in an *rpsB* mutant.

346

## 347 **Physiological implications of SpeG-RcsB interactions**

348 It has been estimated that RcsB regulates 5% of the *E. coli* genome,  
349 including but not limited to the colanic acid biosynthetic locus, the small RNA *rprA*,  
350 and the operon that encodes FlhDC, the master regulator of flagellar biogenesis  
351 [61, 62]. The Rcs phosphorelay has also been implicated in regulating biofilm  
352 formation and sensitivity to antibiotic-induced peptidoglycan damage [16, 62-64].  
353 Since the SpeG interaction with RcsB regulates activation of *rprA* transcription,  
354 SpeG likely influences these other RcsB-regulated phenotypes. In fact, it has been  
355 reported that polyamines can induce the glutamate-dependent acid response  
356 system [65], which requires RcsB [66]. The outstanding question is why polyamine  
357 neutralization and cellular processes regulated by RcsB would be coordinated. We  
358 conjecture that SpeG works through members of the RcsB regulon required to  
359 initiate proper responses to particular extracellular conditions such as cold shock,  
360 heat shock, ethanol, and increased alkalinity, which were shown to influence the  
361 spermidine metabolic pathway [67].

362

## 363 **Conclusion**

364 We have shown that SpeG and RcsB can form a complex, suggesting a  
365 coordinated response between polyamine metabolism and envelope stress. It is  
366 not known why an enzyme involved in spermidine metabolism regulates RcsB, if  
367 RcsB affects spermidine biosynthesis, or whether SpeG acts as a general  
368 modulator of response regulators. However, it is clear that SpeG inhibits RcsB

369 activity *in vivo* and we propose that it is through a direct interaction between SpeG  
370 and the DNA binding domain of RcsB.

371

## 372 **Materials and Methods**

### 373 **Bacterial strains, bacteriophage, and plasmids**

374 All of the bacterial strains, bacteriophage, and plasmids used in this study are  
375 listed in **Table 1**. Derivatives were constructed by generalized transduction with  
376 P1kc [68]. *PrprA142-lacZ*, a transcriptional fusion of the *rprA* promoter (*PrprA*) to  
377 the *lacZ* reporter, was from Dr. Susan Gottesman (National Institutes of Health,  
378 Bethesda, MD) [12]. Construction of monolysogens was performed and verified as  
379 described previously [69]. Transformations were performed by electroporation or  
380 through the use of either transformation buffers 1 and 2 [70] or transformation-and-  
381 storage solution [71].

382

### 383 **Culture conditions**

384 For strain construction, cells were grown in lysogeny broth (LB) consisting of  
385 1% (w/v) tryptone, 0.5% (w/v) yeast extract, and 0.5% (w/v) sodium chloride; LB  
386 plates contained 1.5% agar. For promoter activity assays, cells were grown in  
387 tryptone broth buffered at pH 7 (TB7), which contains 1% (w/v) tryptone buffered  
388 at pH 7.0 with potassium phosphate (100 mM). Cell growth was monitored  
389 spectrophotometrically (DU640; Beckman Instruments, Fullerton, CA) by  
390 determining the absorbance at 600 nm ( $OD_{600}$ ). Chloramphenicol (25  $\mu$ g/ml) was  
391 added to growth media when needed to maintain pCA24n plasmid derivatives. To

392 induce the expression of genes carried on various plasmids, 10  $\mu$ M isopropyl- $\beta$ -D-  
393 thiogalactopyranoside (IPTG) was added to the growth media.

394

### 395 **$\beta$ -galactosidase assay**

396 To monitor the promoter activity of *PrprA-lacZ*, biological replicates were grown  
397 aerobically at 37°C in TB7 overnight. The overnight cultures were diluted in fresh  
398 TB7 to an OD<sub>600</sub> of 0.05 and grown aerobically with agitation at 250 rpm at 37°C  
399 until early stationary phase. At regular intervals, cells were harvested and stored  
400 at 4°C in a microtiter plate.  $\beta$ -galactosidase activity was determined quantitatively  
401 as described previously (26) using All-in-One  $\beta$ -galactosidase reagent (Pierce  
402 Biochemical). Sterile TB7 was used as a negative control on each microtiter plate.  
403 Promoter activity was monitored throughout growth and plotted against OD<sub>600</sub>.  
404 Each individual experiment included at least three biological replicates. Each of  
405 these experiments was performed at least three times. The values represent the  
406 means with standard deviations.

407

### 408 **Site-directed mutagenesis**

409 Site-directed mutagenesis of SpeG to pCA24n-speG(Y135A) was conducted  
410 in pCA24n-*speG* with the QuikChange Lightning Multi site-directed mutagenesis  
411 kit (Agilent Technologies), in accordance with the manufacturer's instructions by  
412 using the mutagenic primers SDMspeGY135A and SDMspeGY135A\_as, as listed  
413 in **Table 1**.

414

## 415 **RcsB, RcsA and SpeG expression plasmids**

416 Plasmids containing genes from *Escherichia coli* str. K-12 substr. MG1655  
417 included the following: 1) full-length RcsB (NCBI accession code AAC75277, GI:  
418 1788546) in the pCA24n vector from the ASKA collection (chloramphenicol  
419 resistant; pCA24n-*rcsB*) [51], 2) the N-terminal receiver domain of RcsB (truncated  
420 construct, residues 1-147) in the pMCSG7 vector (ampicillin resistant; pMCSG7-  
421 *rcsB*(NTD)), 3) the C-terminal DNA binding domain of RcsB (truncated construct,  
422 residues 128-216) in the pMCSG7 vector (ampicillin resistant; pMCSG7-  
423 *rcsB*(CTD)), 4) full-length RcsA (NCBI accession code WP\_000104001 and GI:  
424 CTS77413) in the pMCSG53 vector (ampicillin resistant; pMCSG53-*rcsA*) and 5)  
425 full-length SpeG (NCBI accession code NP\_416101, GI: 16129542) in the  
426 pMCSG7 vector (ampicillin resistant; pMCSG7-*speG*). The full-length RcsB  
427 construct (pCA24n-*rcsB*) and its truncated versions ((pMCSG7-*rcsB*(NTD) and  
428 pMCSG7-*rcsB*(CTD)) had an uncleavable N-terminal polyhistidine tag, while the  
429 RcsA (pMCSG53-*rcsA*) and SpeG (pMCSG7-*speG*) constructs had a cleavable N-  
430 terminal polyhistidine tag followed by a TEV protease cleavage site [51]. The  
431 genes for the individual RcsB domains were synthesized by Genescript and  
432 subcloned into the pMCSG7 vector using ligation independent cloning as  
433 described previously [72, 73]. A portion of the linker sequence (comprised of  
434 residues 121-149) between the domains was included in each individual domain  
435 construct.

436

## 437 **Large-scale protein expression and purification**

438 Expression plasmids containing the desired genes were transformed into  
439 kanamycin-resistant BL21(DE3)-magic or KRX/pGro7 (for pMCSG53-*rcsA*)  
440 competent cells [74]. pCA24n-*rcsB* transformants were grown in Terrific Broth (TB)  
441 in the presence of 34 µg/mL chloramphenicol and 35 µg/mL kanamycin. pMCSG7-  
442 *rcsB*(NTD) and pMCSG7-*rcsB*(CTD) transformants were grown in LB in the  
443 presence of 400 µg/mL ampicillin and 25 µg/mL kanamycin. The pMCSG53-*rcsA*  
444 transformant was grown in M9 L-selenomethionine supplemented media  
445 (Medicilon Inc.) in the presence of 400 µg/mL ampicillin, 35 µg/mL kanamycin and  
446 0.1% arabinose. pMCSG7-*speG* transformants were grown in TB supplemented  
447 with 100 µg/mL ampicillin and 50 µg/mL kanamycin.

448 Full-length RcsB protein, its N-terminal and C-terminal domains, and RcsA  
449 protein were prepared at the Recombinant Protein Production Core (rPPC) Facility  
450 at Northwestern University (Evanston, IL, USA). Transformants containing the  
451 RcsB and RcsA plasmids were grown at 37°C in a fermenter until the OD<sub>600</sub>  
452 reached 0.8, whereupon they were induced with 0.6 mM IPTG. The RcsA  
453 transformant was also exposed to 0.25% L-rhamnose. The RcsB constructs were  
454 expressed at 25°C overnight, whereas RcsA was expressed at 22°C overnight.  
455 The next day cells were harvested by centrifugation and resuspended in lysis  
456 buffer (1.5 mM magnesium acetate, 1mM calcium chloride, 250 mM sodium  
457 chloride, 100 mM ammonium sulfate, 40 mM disodium phosphate, 3.25 mM citric  
458 acid, 5% glycerol, 5 mM imidazole, 5 mM beta-mercaptoethanol (BME), 0.08% n-  
459 dodecyl-beta-maltoside (DDM), 1 mM phenylmethylsulfonyl fluoride (PMSF), and  
460 20 µM leupeptin) and homogenized. Cells containing the SpeG plasmid were

461 grown at 37°C in a benchtop shaker to an OD<sub>600</sub> of 0.6, induced with 0.5 mM IPTG,  
462 and expressed at 25°C overnight. Cells were harvested and resuspended in lysis  
463 buffer (as stated above without PMSF and leupeptin) and sonicated. After  
464 sonication, lysates were centrifuged and the supernatant was purified as follows.

465 The proteins were purified using an ÄKTAexpress™ (GE Healthcare,  
466 Piscataway, NJ) high-throughput purification system at 4°C. The crude extract was  
467 loaded onto a 5 mL HisTrap FF Ni-NTA column, washed with loading buffer (10  
468 mM Tris HCl pH 8.3, 500 mM sodium chloride and 5 mM BME), washed with  
469 loading buffer plus 25 mM imidazole to remove impurities, and eluted with loading  
470 buffer plus 500 mM imidazole. The purified proteins were subsequently loaded  
471 onto and eluted from a HiLoad™ 26/60 Superdex™ 200 size-exclusion column in  
472 loading buffer. The polyhistidine tag of the SpeG protein was removed, as  
473 described previously [75]; for all other constructs, the tag remained attached. The  
474 final purity of each protein was assayed by SDS-PAGE.

475

#### 476 **Enzyme kinetic assays**

477 To test whether SpeG could acetylate RcsB, we performed *in vitro* enzyme  
478 kinetics, using a previously described assay and recombinantly expressed and  
479 purified proteins [7, 54]. The total volume for each reaction was 50 µL and  
480 contained 50 mM Bicine pH 9.0, 0.5 mM acCoA, 1 mM spermidine, 0.96 µM SpeG  
481 enzyme, and/or 0.1 mM RcsB full-length protein. All reactions were initiated with  
482 10 µL of SpeG enzyme or enzyme dilution buffer (100 mM Bicine pH 9.0, 100 mM  
483 sodium chloride) and were performed in triplicate at 35°C for 20 min. To stop the



484 reactions, 50  $\mu$ L of a solution containing 100 mM Tris HCl pH 8.0 and 6 M  
485 guanidine HCl was added to each reaction. To detect the product of the reaction  
486 (CoA), 200  $\mu$ L of a solution containing 0.2 mM 5,5'-Dithiobis(2-nitrobenzoic acid),  
487 100 mM Tris HCl pH 8.0, and 1 mM EDTA was added to each reaction and  
488 incubated for 10 min at room temperature. The absorbance was then measured at  
489 415 nm on a Biotek ELx808 microplate reader.

490

491 **Surface plasmon resonance (SPR) analysis of binding interactions between**  
492 **SpeG and RcsB in absence or presence of spermidine**

493 Binding interactions of *E. coli* SpeG to full-length *E. coli* RcsB or individual RcsB  
494 domains in the absence of spermidine were measured using a Reichert  
495 SR7500DC (Reichert Technologies, Buffalo, NY) dual channel spectrometer at the  
496 Keck Biophysics Facility at Northwestern University (Evanston IL, USA). Prior to  
497 immobilizing SpeG onto a carboxymethyl dextran hydrogel surface gold sensor  
498 chip (Reichert Technologies, Buffalo, NY), the surface of the chip containing COO<sup>-</sup>  
499 groups were activated with a mixture of N-hydroxysuccinimide (NHS) and 1-ethyl-  
500 3-(3-dimethylaminopropyl)carbodiimide hydrochloride (EDC) to create amine  
501 reactive esters. SpeG protein (46  $\mu$ M) in solution containing 10 mM HEPES at pH  
502 8.3 and 100 mM sodium chloride was then immobilized onto the chip and  
503 covalently coupled with the surface NHS esters at a flow rate of 40  $\mu$ L/min at room  
504 temperature. To achieve saturation, two sequential injections of SpeG for 3 min  
505 followed by 1.5 min of dissociation were performed. To block formation of residual  
506 NHS esters, an ethanolamine solution was injected over the chip. To remove

507 weakly bound SpeG molecules, the chip was washed with running buffer  
508 containing 10 mM HEPES at pH 8.3 and 100 mM sodium chloride. The instrument  
509 was cooled and all SPR measurements were carried out at 4°C. All protein  
510 solutions were prepared in running buffer. 160  $\mu$ L of RcsB full-length (10, 21, 42,  
511 53, 63 and 74  $\mu$ M), RcsB C-terminal domain (45, 67, 91, 114, 136, and 159  $\mu$ M),  
512 or RcsB N-terminal domain (59, 118, and 176  $\mu$ M) were injected sequentially over  
513 the SpeG-chip with a flow rate of 40  $\mu$ L min<sup>-1</sup> for 30 sec followed by a 1.5 min rinse  
514 and a 1 min dissociation. After each binding cycle, SpeG surfaces were  
515 regenerated by injecting 0.5 M sodium chloride for 45 sec at a flow rate of 30  $\mu$ L  
516 min<sup>-1</sup> and washed with running buffer. All analyte injections were performed in  
517 duplicate. For each measurement, a background response recorded in the  
518 reference cell was subtracted as well as the response from a blank injection with  
519 the running buffer.

520 To investigate how spermidine affects binding interactions of SpeG to RcsB  
521 and its individual domains, we used a Reichert4SR (Reichert Technologies,  
522 Buffalo, NY) four-channel SPR system at the Keck Biophysics Facility. SpeG was  
523 immobilized at a concentration of 46  $\mu$ M onto cells 3 and 4 using the amine  
524 coupling procedure described above. Cells 1 and 2 were used as reference cells.  
525 All measurements were performed at 4°C. A solution containing 0.5 mM  
526 spermidine in the running buffer was flowed over the surface of the immobilized  
527 SpeG at 40  $\mu$ L min<sup>-1</sup> for 30 sec followed by a 1.5 min rinse and a 1 min dissociation.  
528 The chip was then washed with running buffer until the SPR signal reached a  
529 stable value. 160  $\mu$ L of RcsB full-length (10, 21, 42, 53, 63 and 74  $\mu$ M), RcsB C-

530 terminal domain (23, 45, 91, 114, and 136  $\mu\text{M}$ ) or RcsB N-terminal domain (59,  
531 118, 177, 236 and 295  $\mu\text{M}$ ) were injected sequentially over the SpeG-chip, as  
532 described above, to monitor binding of RcsB constructs to SpeG in the presence  
533 of spermidine. After each binding cycle of RcsB full-length and RcsB C-terminal  
534 domain, SpeG surfaces were regenerated with an injection of 0.5 M sodium  
535 chloride for 1.5 min at a flow rate of 30  $\mu\text{L min}^{-1}$  and washed with the running buffer.  
536 Regeneration of the chip surface after injections of RcsB N-terminal domain was  
537 not required because the protein dissociated on its own. A background response  
538 for each run and the response from a blank injection were subtracted. With the  
539 exception of the RcsB N-terminal domain in the absence of spermidine, duplicate  
540 measurements were collected for each concentration of each protein. Data  
541 processing and kinetic analyses for all experiments were performed using  
542 TraceDrawer Data Analysis software (Reichert Technologies, Buffalo, NY).

543

#### 544 **SPR analysis of binding interactions between SpeG and the transcription** 545 **factor RcsA**

546 To examine binding interactions between SpeG and RcsB's auxiliary partner  
547 RcsA from *E. coli*, we used a four-channel SPR system at the Keck Biophysics  
548 Facility following the amine coupling protocol, as described above. SpeG protein  
549 at a concentration of 46  $\mu\text{M}$  in 10 mM HEPES buffer at pH 8.3 containing 100 mM  
550 sodium chloride was immobilized onto the chip. 160  $\mu\text{L}$  of RcsA protein solution in  
551 running buffer (21, 42, 64 and 85  $\mu\text{M}$ ) was injected consecutively over the SpeG-  
552 chip followed by regeneration and washing, as described above. A background

553 response and response from a blank injection that contained running buffer were  
554 subtracted from each sensorgram to determine the actual binding response. Data  
555 were processed using TraceDrawer software.

556

## 557 **Linear Regression Analysis**

558 To determine whether experimental results were statistically significant, a linear  
559 regression was performed, comparing all experimental groups with their respective  
560 vector controls. All of the regressions used were set up as follows: the calculated  
561 *rprA* promoter activity was the response variable, the overexpressed plasmids or  
562 mutant were the explanatory variable, and time was a random effect. OD was not  
563 included as an effect on activity as it is already used in the calculation of activity.  
564 Time as a random effect was chosen based on the question asked: Accounting for  
565 the effects of time on activity does the experimental group in question significantly  
566 affect overall *rprA* promoter activity? The significance threshold was set at 0.05.  
567 The open source program R (version 3.3.2) and packages “lmerTest”, “ggplot2”,  
568 and “moments” were used to visualize and analyze the data (76,77,78,79).

569

## 570 **Acknowledgements**

571 We would like to thank the Keck Biophysics Facility at Northwestern  
572 University (Evanston, IL) for assistance with SPR data collection, Roberto Limeira  
573 and Cara Joyce (Loyola University Chicago) for the linear regression analyses of  
574 the *in vivo* data, Sarah Cook, David Christensen, and Bozena Zemaitaitis (Loyola  
575 University Chicago) for helping to complete and repeat the acetyltransferase

576 overexpression experiments, and the members of the Visick and Wolfe labs  
577 (Loyola University Chicago) for important scientific discussions pertaining to this  
578 study.

579

## 580 References

- 581 1. Fukuchi J, Kashiwagi K, Yamagishi M, Ishihama A, Igarashi K. Decrease in cell  
582 viability due to the accumulation of spermidine in spermidine acetyltransferase-  
583 deficient mutant of *Escherichia coli*. *The Journal of biological chemistry*.  
584 1995;270(32):18831-5.
- 585 2. Limsuwun K, Jones PG. Spermidine acetyltransferase is required to prevent  
586 spermidine toxicity at low temperatures in *Escherichia coli*. *Journal of bacteriology*.  
587 2000;182(19):5373-80.
- 588 3. Barbagallo M, Di Martino ML, Marcocci L, Pietrangeli P, De Carolis E, Casalino  
589 M, et al. A new piece of the *Shigella* Pathogenicity puzzle: spermidine accumulation  
590 by silencing of the *speG* gene [corrected]. *PloS one*. 2011;6(11):e27226.
- 591 4. Campilongo R, Di Martino ML, Marcocci L, Pietrangeli P, Leuzzi A, Grossi M, et  
592 al. Molecular and functional profiling of the polyamine content in enteroinvasive *E.*  
593 *coli* : looking into the gap between commensal *E. coli* and harmful *Shigella*. *PloS one*.  
594 2014;9(9):e106589.
- 595 5. Joshi GS, Spontak JS, Klapper DG, Richardson AR. Arginine catabolic mobile  
596 element encoded *speG* abrogates the unique hypersensitivity of *Staphylococcus*  
597 *aureus* to exogenous polyamines. *Molecular microbiology*. 2011;82(1):9-20.
- 598 6. Thurlow LR, Joshi GS, Clark JR, Spontak JS, Neely CJ, Maile R, et al. Functional  
599 modularity of the arginine catabolic mobile element contributes to the success of  
600 USA300 methicillin-resistant *Staphylococcus aureus*. *Cell host & microbe*.  
601 2013;13(1):100-7.
- 602 7. Filippova EV, Kuhn ML, Osipiuk J, Kiryukhina O, Joachimiak A, Ballicora MA, et  
603 al. A novel polyamine allosteric site of *SpeG* from *Vibrio cholerae* is revealed by its  
604 dodecameric structure. *Journal of molecular biology*. 2015;427(6 Pt B):1316-34.
- 605 8. Fukuchi J, Kashiwagi K, Takio K, Igarashi K. Properties and structure of  
606 spermidine acetyltransferase in *Escherichia coli*. *The Journal of biological chemistry*.  
607 1994;269(36):22581-5.
- 608 9. Sugiyama S, Ishikawa S, Tomitori H, Niiyama M, Hirose M, Miyazaki Y, et al.  
609 Molecular mechanism underlying promiscuous polyamine recognition by spermidine  
610 acetyltransferase. *The international journal of biochemistry & cell biology*.  
611 2016;76:87-97.
- 612 10. Filippova EV, Weigand S, Osipiuk J, Kiryukhina O, Joachimiak A, Anderson WF.  
613 Substrate-Induced Allosteric Change in the Quaternary Structure of the Spermidine  
614 N-Acetyltransferase *SpeG*. *Journal of molecular biology*. 2015;427(22):3538-53.
- 615 11. Majdalani N, Chen S, Murrow J, St John K, Gottesman S. Regulation of *RpoS* by  
616 a novel small RNA: the characterization of *RprA*. *Molecular microbiology*.  
617 2001;39(5):1382-94.
- 618 12. Majdalani N, Hernandez D, Gottesman S. Regulation and mode of action of the  
619 second small RNA activator of *RpoS* translation, *RprA*. *Molecular microbiology*.  
620 2002;46(3):813-26.
- 621 13. Bourret RB. Receiver domain structure and function in response regulator  
622 proteins. *Current opinion in microbiology*. 2010;13(2):142-9.

- 623 14. Salazar ME, Laub MT. Temporal and evolutionary dynamics of two-component  
624 signaling pathways. *Current opinion in microbiology*. 2015;24:7-14.
- 625 15. Jung K, Fried L, Behr S, Heermann R. Histidine kinases and response regulators  
626 in networks. *Current opinion in microbiology*. 2012;15(2):118-24.
- 627 16. Majdalani N, Gottesman S. The Rcs phosphorelay: a complex signal  
628 transduction system. *Annual review of microbiology*. 2005;59:379-405.
- 629 17. Mariscotti JF, Garcia-Del Portillo F. Instability of the Salmonella RcsCDB  
630 signalling system in the absence of the attenuator IgaA. *Microbiology*. 2008;154(Pt  
631 5):1372-83.
- 632 18. Castanie-Cornet MP, Cam K, Jacq A. RcsF is an outer membrane lipoprotein  
633 involved in the RcsCDB phosphorelay signaling pathway in *Escherichia coli*. *Journal  
634 of bacteriology*. 2006;188(12):4264-70.
- 635 19. Cho SH, Szewczyk J, Pesavento C, Zietek M, Banzhaf M, Roszczenko P, et al.  
636 Detecting envelope stress by monitoring beta-barrel assembly. *Cell*.  
637 2014;159(7):1652-64.
- 638 20. Konovalova A, Perlman DH, Cowles CE, Silhavy TJ. Transmembrane domain of  
639 surface-exposed outer membrane lipoprotein RcsF is threaded through the lumen of  
640 beta-barrel proteins. *Proceedings of the National Academy of Sciences of the United  
641 States of America*. 2014;111(41):E4350-8.
- 642 21. Mariscotti JF, Garcia-del Portillo F. Genome expression analyses revealing the  
643 modulation of the Salmonella Rcs regulon by the attenuator IgaA. *Journal of  
644 bacteriology*. 2009;191(6):1855-67.
- 645 22. Hussein NA, Cho SH, Laloux G, Siam R, Collet JF. Distinct domains of *Escherichia  
646 coli* IgaA connect envelope stress sensing and down-regulation of the Rcs  
647 phosphorelay across subcellular compartments. *PLoS Genet*. 2018;14(5):e1007398.
- 648 23. Pucciarelli MG, Rodriguez L, Garcia-Del Portillo F. A Disulfide Bond in the  
649 Membrane Protein IgaA Is Essential for Repression of the RcsCDB System. *Front  
650 Microbiol*. 2017;8:2605.
- 651 24. Sato T, Takano A, Hori N, Izawa T, Eda T, Sato K, et al. Role of the inner-  
652 membrane histidine kinase RcsC and outer-membrane lipoprotein RcsF in the  
653 activation of the Rcs phosphorelay signal transduction system in *Escherichia coli*.  
654 *Microbiology*. 2017;163(7):1071-80.
- 655 25. Fredericks CE, Shibata S, Aizawa S, Reimann SA, Wolfe AJ. Acetyl phosphate-  
656 sensitive regulation of flagellar biogenesis and capsular biosynthesis depends on the  
657 Rcs phosphorelay. *Molecular microbiology*. 2006;61(3):734-47.
- 658 26. Howery KE, Clemmer KM, Rather PN. The Rcs regulon in *Proteus mirabilis*:  
659 implications for motility, biofilm formation, and virulence. *Current genetics*. 2016.
- 660 27. Lehti TA, Heikkinen J, Korhonen TK, Westerlund-Wikstrom B. The response  
661 regulator RcsB activates expression of Mat fimbriae in meningitic *Escherichia coli*.  
662 *Journal of bacteriology*. 2012;194(13):3475-85.
- 663 28. Wang Q, Harshey RM. Rcs signalling-activated transcription of *rcaA* induces  
664 strong anti-sense transcription of upstream *fliPQR* flagellar genes from a weak  
665 intergenic promoter: regulatory roles for the anti-sense transcript in virulence and  
666 motility. *Molecular microbiology*. 2009;74(1):71-84.



- 667 29. Hu LI, Chi BK, Kuhn ML, Filippova EV, Walker-Peddakotla AJ, Basell K, et al.  
668 Acetylation of the response regulator RcsB controls transcription from a small RNA  
669 promoter. *Journal of bacteriology*. 2013;195(18):4174-86.
- 670 30. Francez-Charlot A, Laugel B, Van Gemert A, Dubarry N, Wiorowski F, Castanie-  
671 Cornet MP, et al. RcsCDB His-Asp phosphorelay system negatively regulates the flhDC  
672 operon in *Escherichia coli*. *Molecular microbiology*. 2003;49(3):823-32.
- 673 31. Filippova EV, Zemaitaitis B, Aung T, Wolfe AJ, Anderson WF. Structural Basis  
674 for DNA Recognition by the Two-Component Response Regulator RcsB. *MBio*.  
675 2018;9(1).
- 676 32. Pristovsek P, Sengupta K, Lohr F, Schafer B, von Trebra MW, Ruterjans H, et al.  
677 Structural analysis of the DNA-binding domain of the *Erwinia amylovora* RcsB protein  
678 and its interaction with the RcsAB box. *The Journal of biological chemistry*.  
679 2003;278(20):17752-9.
- 680 33. Wehland M, Bernhard F. The RcsAB box. Characterization of a new operator  
681 essential for the regulation of exopolysaccharide biosynthesis in enteric bacteria. *The*  
682 *Journal of biological chemistry*. 2000;275(10):7013-20.
- 683 34. Castanie-Cornet MP, Cam K, Bastiat B, Cros A, Bordes P, Gutierrez C. Acid stress  
684 response in *Escherichia coli*: mechanism of regulation of *gadA* transcription by RcsB  
685 and GadE. *Nucleic acids research*. 2010;38(11):3546-54.
- 686 35. Pannen D, Fabisch M, Gausling L, Schnetz K. Interaction of the RcsB Response  
687 Regulator with Auxiliary Transcription Regulators in *Escherichia coli*. *The Journal of*  
688 *biological chemistry*. 2016;291(5):2357-70.
- 689 36. Stratmann T, Pul U, Wurm R, Wagner R, Schnetz K. RcsB-BglJ activates the  
690 *Escherichia coli* *leuO* gene, encoding an H-NS antagonist and pleiotropic regulator of  
691 virulence determinants. *Molecular microbiology*. 2012;83(6):1109-23.
- 692 37. Kuhne C, Singer HM, Grabisch E, Codutti L, Carlomagno T, Scrima A, et al. RflM  
693 mediates target specificity of the RcsCDB phosphorelay system for transcriptional  
694 repression of flagellar synthesis in *Salmonella enterica*. *Molecular microbiology*.  
695 2016;101(5):841-55.
- 696 38. Nassif X, Honore N, Vasselon T, Cole ST, Sansonetti PJ. Positive control of  
697 colanic acid synthesis in *Escherichia coli* by *rmpA* and *rmpB*, two virulence-plasmid  
698 genes of *Klebsiella pneumoniae*. *Molecular microbiology*. 1989;3(10):1349-59.
- 699 39. Mouslim C, Latifi T, Groisman EA. Signal-dependent requirement for the co-  
700 activator protein RcsA in transcription of the RcsB-regulated *ugd* gene. *The Journal of*  
701 *biological chemistry*. 2003;278(50):50588-95.
- 702 40. Thao S, Chen CS, Zhu H, Escalante-Semerena JC. Nepsilon-lysine acetylation of  
703 a bacterial transcription factor inhibits its DNA-binding activity. *PloS one*.  
704 2010;5(12):e15123.
- 705 41. Kuhn ML, Zemaitaitis B, Hu LI, Sahu A, Sorensen D, Minasov G, et al. Structural,  
706 kinetic and proteomic characterization of acetyl phosphate-dependent bacterial  
707 protein acetylation. *PloS one*. 2014;9(4):e94816.
- 708 42. Schilling B, Christensen D, Davis R, Sahu AK, Hu LI, Walker-Peddakotla A, et al.  
709 Protein acetylation dynamics in response to carbon overflow in *Escherichia coli*.  
710 *Molecular microbiology*. 2015;98(5):847-63.



- 711 43. Weinert BT, Iesmantavicius V, Wagner SA, Scholz C, Gummesson B, Beli P, et  
712 al. Acetyl-phosphate is a critical determinant of lysine acetylation in *E. coli*. *Molecular*  
713 *cell*. 2013;51(2):265-72.
- 714 44. Hentchel KL, Escalante-Semerena JC. Acylation of Biomolecules in  
715 Prokaryotes: a Widespread Strategy for the Control of Biological Function and  
716 Metabolic Stress. *Microbiology and molecular biology reviews* : MMBR.  
717 2015;79(3):321-46.
- 718 45. Wolfe AJ. Bacterial protein acetylation: new discoveries unanswered  
719 questions. *Current genetics*. 2016;62(2):335-41.
- 720 46. Ren J, Sang Y, Tan Y, Tao J, Ni J, Liu S, et al. Acetylation of Lysine 201 Inhibits  
721 the DNA-Binding Ability of PhoP to Regulate *Salmonella* Virulence. *PLoS pathogens*.  
722 2016;12(3):e1005458.
- 723 47. Castano-Cerezo S, Bernal V, Post H, Fuhrer T, Cappadona S, Sanchez-Diaz NC,  
724 et al. Protein acetylation affects acetate metabolism, motility and acid stress response  
725 in *Escherichia coli*. *Molecular systems biology*. 2014;10:762.
- 726 48. Datsenko KA, Wanner BL. One-step inactivation of chromosomal genes in  
727 *Escherichia coli* K-12 using PCR products. *Proceedings of the National Academy of*  
728 *Sciences of the United States of America*. 2000;97(12):6640-5.
- 729 49. Baba T, Ara T, Hasegawa M, Takai Y, Okumura Y, Baba M, et al. Construction of  
730 *Escherichia coli* K-12 in-frame, single-gene knockout mutants: the Keio collection.  
731 *Molecular systems biology*. 2006;2:2006 0008.
- 732 50. Dieckman L, Gu M, Stols L, Donnelly MI, Collart FR. High throughput methods  
733 for gene cloning and expression. *Protein expression and purification*. 2002;25(1):1-7.
- 734 51. Kitagawa M, Ara T, Arifuzzaman M, Ioka-Nakamichi T, Inamoto E, Toyonaga H,  
735 et al. Complete set of ORF clones of *Escherichia coli* ASKA library (a complete set of *E.*  
736 *coli* K-12 ORF archive): unique resources for biological research. *DNA research* : an  
737 international journal for rapid publication of reports on genes and genomes.  
738 2005;12(5):291-9.
- 739 52. Stols L, Gu M, Dieckman L, Raffin R, Collart FR, Donnelly MI. A new vector for  
740 high-throughput, ligation-independent cloning encoding a tobacco etch virus  
741 protease cleavage site. *Protein expression and purification*. 2002;25(1):8-15.
- 742 53. Eschenfeldt WH, Makowska-Grzyska M, Stols L, Donnelly MI, Jedrzejczak R,  
743 Joachimiak A. New LIC vectors for production of proteins from genes containing rare  
744 codons. *J Struct Funct Genomics*. 2013;14(4):135-44.
- 745 54. Kuhn ML, Majorek KA, Minor W, Anderson WF. Broad-substrate screen as a  
746 tool to identify substrates for bacterial Gcn5-related N-acetyltransferases with  
747 unknown substrate specificity. *Protein science* : a publication of the Protein Society.  
748 2013;22(2):222-30.
- 749 55. Majorek KA, Kuhn ML, Chruszcz M, Anderson WF, Minor W. Structural,  
750 functional, and inhibition studies of a Gcn5-related N-acetyltransferase (GNAT)  
751 superfamily protein PA4794: a new C-terminal lysine protein acetyltransferase from  
752 *Pseudomonas aeruginosa*. *The Journal of biological chemistry*. 2013;288(42):30223-  
753 35.
- 754 56. Majorek KA, Osinski T, Tran DT, Revilla A, Anderson WF, Minor W, et al. Insight  
755 into the 3D structure and substrate specificity of previously uncharacterized GNAT

- 756 superfamily acetyltransferases from pathogenic bacteria. *Biochim Biophys Acta*.  
757 2017;1865(1):55-64.
- 758 57. Vetting MW, Bareich DC, Yu M, Blanchard JS. Crystal structure of RimI from  
759 *Salmonella typhimurium* LT2, the GNAT responsible for N(alpha)-acetylation of  
760 ribosomal protein S18. *Protein Sci*. 2008;17(10):1781-90.
- 761 58. Stout V, Gottesman S. RcsB and RcsC: a two-component regulator of capsule  
762 synthesis in *Escherichia coli*. *Journal of bacteriology*. 1990;172(2):659-69.
- 763 59. Altschul SF, Madden TL, Schaffer AA, Zhang J, Zhang Z, Miller W, et al. Gapped  
764 BLAST and PSI-BLAST: a new generation of protein database search programs.  
765 *Nucleic acids research*. 1997;25(17):3389-402.
- 766 60. Brill JA, Quinlan-Walshe C, Gottesman S. Fine-structure mapping and  
767 identification of two regulators of capsule synthesis in *Escherichia coli* K-12. *Journal*  
768 *of bacteriology*. 1988;170(6):2599-611.
- 769 61. Majdalani N, Heck M, Stout V, Gottesman S. Role of RcsF in signaling to the Rcs  
770 phosphorelay pathway in *Escherichia coli*. *Journal of bacteriology*.  
771 2005;187(19):6770-8.
- 772 62. Pruss BM, Besemann C, Denton A, Wolfe AJ. A complex transcription network  
773 controls the early stages of biofilm development by *Escherichia coli*. *Journal of*  
774 *bacteriology*. 2006;188(11):3731-9.
- 775 63. Laubacher ME, Ades SE. The Rcs phosphorelay is a cell envelope stress  
776 response activated by peptidoglycan stress and contributes to intrinsic antibiotic  
777 resistance. *Journal of bacteriology*. 2008;190(6):2065-74.
- 778 64. Richter L, Johnston A, Lam A. The Rcs Phosphorelay System and RcsB  
779 Regulated rprA Contribute to Intrinsic Antibiotic Resistance in *Escherichia coli*  
780 Exposed to Antibiotics Targeting the Cell Wall. *J Exper Microbiol and Immunol*.  
781 2016;2:42-8.
- 782 65. Chattopadhyay MK, Keembiyehetty CN, Chen W, Tabor H. Polyamines  
783 Stimulate the Level of the sigma38 Subunit (RpoS) of *Escherichia coli* RNA  
784 Polymerase, Resulting in the Induction of the Glutamate Decarboxylase-dependent  
785 Acid Response System via the gadE Regulon. *The Journal of biological chemistry*.  
786 2015;290(29):17809-21.
- 787 66. Castanie-Cornet MP, Treffandier H, Francez-Charlot A, Gutierrez C, Cam K. The  
788 glutamate-dependent acid resistance system in *Escherichia coli*: essential and dual  
789 role of the His-Asp phosphorelay RcsCDB/AF. *Microbiology*. 2007;153(Pt 1):238-46.
- 790 67. Carper SW, Willis DG, Manning KA, Gerner EW. Spermidine acetylation in  
791 response to a variety of stresses in *Escherichia coli*. *The Journal of biological*  
792 *chemistry*. 1991;266(19):12439-41.
- 793 68. Silhavy TJ, Berman, M. L., and Enquist, L. W. Experiments with gene fusions.  
794 Cold Spring Harbor, NY: Cold Spring Harbor Laboratory; 1984.
- 795 69. Powell BS, Rivas MP, Court DL, Nakamura Y, Turnbough CL, Jr. Rapid  
796 confirmation of single copy lambda prophage integration by PCR. *Nucleic acids*  
797 *research*. 1994;22(25):5765-6.
- 798 70. Hanahan D. Studies on transformation of *Escherichia coli* with plasmids.  
799 *Journal of molecular biology*. 1983;166(4):557-80.
- 800 71. Chung CT, Niemela SL, Miller RH. One-step preparation of competent  
801 *Escherichia coli*: transformation and storage of bacterial cells in the same solution.

- 802 Proceedings of the National Academy of Sciences of the United States of America.  
803 1989;86(7):2172-5.
- 804 72. Anderson WFE. Structural Genomics and Drug Discovery. Methods and  
805 Protocols. 1 ed: Humana Press; 2014. 344 p.
- 806 73. Kwon K, Peterson SN. High-throughput cloning for biophysical applications.  
807 Methods in molecular biology. 2014;1140:61-74.
- 808 74. Makowska-Grzyska M, Kim Y, Maltseva N, Li H, Zhou M, Joachimiak G, et al.  
809 Protein production for structural genomics using E. coli expression. Methods in  
810 molecular biology. 2014;1140:89-105.
- 811 75. Kuhn ML, Majorek KA, Minor W, Anderson WF. Broad-substrate screen as a  
812 tool to identify substrates for bacterial Gcn5-related N-acetyltransferases with  
813 unknown substrate specificity. Protein Science. 2013;22(2):222-30.
- 814
- 815

## 816 **Supporting information**

### 817 **S1 Fig. The effect of spermidine on *rprA* in the absence of *SpeE*.**

818 The *speE* mutant was transformed with either the VC or pSpeG and grown in TB7  
819 supplemented with 50  $\mu$ M IPTG and 0, 1.5, 2.5, or 5 mM spermidine. Growth and  
820 *rprA* promoter activity was measured over time. Each data point is an average of  
821 duplicate biological replicates and standard deviations.

### 822 **S2 Fig. Affinity analysis of RcsB binding to *SpeG*.**

823 (A) The maximum responses in the SPR sensograms for the first dilution series of  
824 RcsB C-terminal domain in the absence of spermidine are plotted against the  
825 analyte concentration. (B and C) The SPR sensograms for dilution series of RcsB  
826 full-length and its C-terminal domain after exposure to spermidine. The RcsB full-  
827 length or RcsB C-terminal domain protein was injected in five dilution series with  
828 the following concentrations: 21, 42, 53, 63 and 74  $\mu$ M (B) or 23, 45, 91, 114, and  
829 136  $\mu$ M (C). The fitted data are shown in black.

### 830 **S3 Fig. Phylogenetic tree of LuxR/FixJ DNA-binding domain of** 831 **transcriptional regulators.**

832 Phylogenetic tree was created in ClustalW2 server  
833 (<http://www.ebi.ac.uk/Tools/msa/clustalw2>). A list of 58 representatives of the  
834 conserved LuxR/FixJ DNA-binding domains was generated in NCBI server  
835 (<http://www.ncbi.nlm.nih.gov/Structure/cdd>) and includes DNA-binding domains of  
836 following transcriptional factors: RcsB from *Escherichia coli* (RcsB-Es\_co)  
837 [GI:353570681], RcsB from *Erwinia amylovora* (RcsB-Er\_am) [GI:33357861], YjjQ  
838 from *E. coli* (YjjQ-Es\_co) [GI:83288197], BglJ from *E. coli* (BglJ-Es\_co)

839 [GI:3915634], YahA from *E. coli* (YahA-Es\_co) [GI:2506596], YuaB from *E. coli*  
840 (YuaB-Es\_co) [GI:81783897], DctR from *E. coli* (DctR-Es\_co) [GI:57012697],  
841 RcsA from *E. coli* (RcsA-Es\_co) [GI:60393000], EntR from *Citrobacter freundii*  
842 (EntR-Ci\_fr) [GI:6015049], FimW from *Salmonella enterica* (FimW-Sa\_en)  
843 [GI:585140], LuxR from *Bacteroides thetaiotaomicron* (LuxR-Ba\_th)  
844 [GI:171849138], YgeK from *E. coli* (YgeK-Es\_co) [GI:20140955], UhpA from *E. coli*  
845 (UhpA-Es\_co) [GI:84029412], UvrY from *E. coli* (UvrY-Es\_co) [GI:83288180],  
846 PA0034 from *Pseudomonas aeruginosa* (PA0034-Ps\_ae) [GI:13959718], BvgA  
847 from *Bordetella pertussis* (BvgA-Bo\_pe) [GI:61219948], FimZ from *E. coli* (FimZ-  
848 Es\_co) [GI:84028128], EvgA from *E. coli* (EvgA-Es\_co) [GI:82581667], FixJ from  
849 *Sinorhizobium meliloti* (FixJ-Si\_me) [GI:159163516], StyR from *P. fluorescens*  
850 (StyR-Ps\_fl) [GI:78100993], NodW from *Bradyrhizobium diazoefficiens* (NodW-  
851 Br\_di) [GI:128495], Ycf29 from *Porphyra purpurea* (Ycf29-Po\_pu) [GI:1723332],  
852 Ycf29 from *Cyanophora paradoxa* (Ycf29-Cy\_pa) [GI:1351750], NarL from *E. coli*  
853 (NarL-Es\_co) [GI:24158735], NarP from *E. coli* (NarP-Es\_co) [GI:400374], GerE  
854 from *Bacillus subtilis* (GerE-Ba\_su) [GI:13786948], VraR from *Staphylococcus*  
855 *aureus* (VraR-St\_au) [GI:166007196], LiaR from *B. subtilis* (LiaR-Ba\_su)  
856 [GI:68051995], DegU from *B. subtilis* (DegU-Ba\_su) [GI:118438], YxjL from *B.*  
857 *subtilis* (YxjL-Ba\_su) [GI:20141933], YhjB from *E. coli* (YhjB-Es\_co) [GI:586682],  
858 CsgD from *E. coli* (CsgD-Es\_co) [GI:1706166], MoaR from *Enterobacter*  
859 *aerogenes* (MoaR-En\_ae) [GI:1709068], MalT from *E. coli* (MalT-Es\_co)  
860 [GI:189028606], SgaR from *Hyphomicrobium methylovorum* (SgaR-Hy\_me)  
861 [GI:6094276], Rv08090c from *Mycobacterium tuberculosis* (Rv08090c-My\_tu)

862 [GI:6137301], AgmR from *P. aeruginosa* (AgmR-Ps\_ae) [GI:121420], AlkS from *P.*  
863 *oleovorans* (AlkS-Ps\_ol) [GI:6226550], ComA from *B. subtilis* (ComA-Ba\_su)  
864 [GI:116903], YdfI from *B. subtilis* (YdfI-Ba\_su) [GI:68566110], ExeN from  
865 *Aeromonas salmonicida* (ExeN-Ae\_sa) [GI:1175862], LuxR from *Aliivibrio fischeri*  
866 (LuxR-AI\_fi) [GI:462556], VanR from *Vibrio anguillarum* (VanR-Vi\_an)  
867 [GI:9297072], SolR from *Ralstonia solanacearum* (SolR-Ra\_so) [GI:9297032],  
868 AhyR from *Aeromonas hydrophila* (AhyR-Ae\_hy) [GI:61218504], LasR from *P.*  
869 *aeruginosa* (LasR-Ps\_ae) [GI:125980], Y4HQ from *Sinorhizobium fredii* (Y4HQ-  
870 Si\_fr) [GI:2495427], SdiA from *E. coli* (SdiA-Es\_co) [GI:2506570], PhzR from *P.*  
871 *fluorescens* (PhzR-Ps\_fl) [GI:2495423], CarR from *Pectobacterium carotovorum*  
872 (CarR-Pe\_ca) [GI:2495418], YenR from *Yersinia enterocolitica* (YenR-Ye\_en)  
873 [GI:1723596], RhiR from *Rhizobium leguminosarum* (RhiR-Rh\_le) [GI:417645],  
874 TraR from *S. fredii* (TraR-Si\_fr) [GI:158429605], MoxX from *Paracoccus*  
875 *denitrificans* (MoxX-Pa\_de) [GI:266552], BrpA from *Streptomyces hygroscopicus*  
876 (BrpA-St\_hy) [GI:231653], RaiR from *Rhizobium etli* (RaiR-Rh\_et) [GI:9297035],  
877 TraR from *Agrobacterium tumefaciens* (TraR-Ag\_tu) GI:23200109 and TraJ from  
878 *E. coli* (TraJ-Es\_co) [GI:464931].

879 **S4 Fig. SPR analysis of SpeG and RcsA interaction.**

880 The SPR sensograms of SpeG and transcription regulator RcsA. The RcsA protein  
881 was injected in four dilution series. Duplicate measurements for each  
882 concentration indicated above SPR sensograms were performed.

bioRxiv preprint doi: <https://doi.org/10.1101/462933>; this version posted November 5, 2018. The copyright holder for this preprint (which was not certified by peer review) is the author/funder, who has granted bioRxiv a license to display the preprint in perpetuity. It is made available under aCC-BY 4.0 International license.

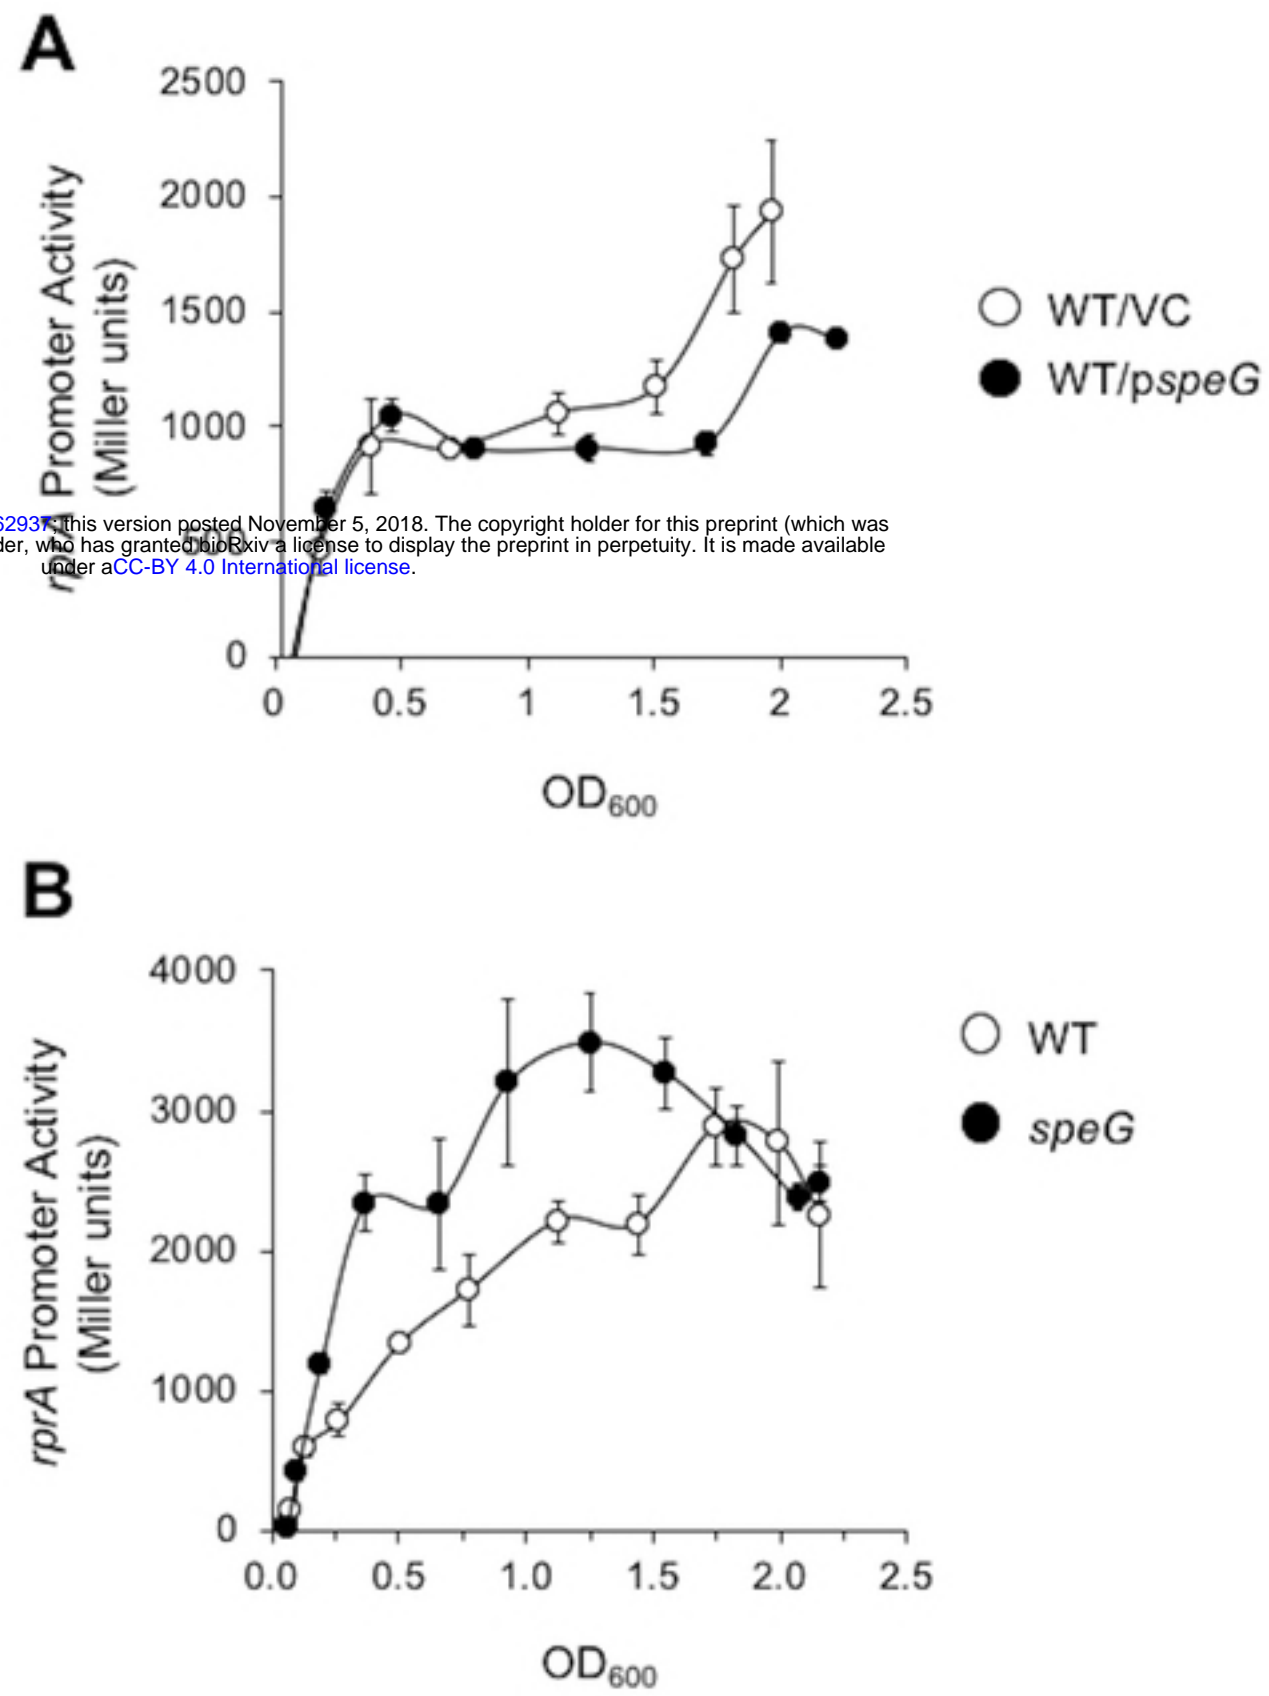

Fig1



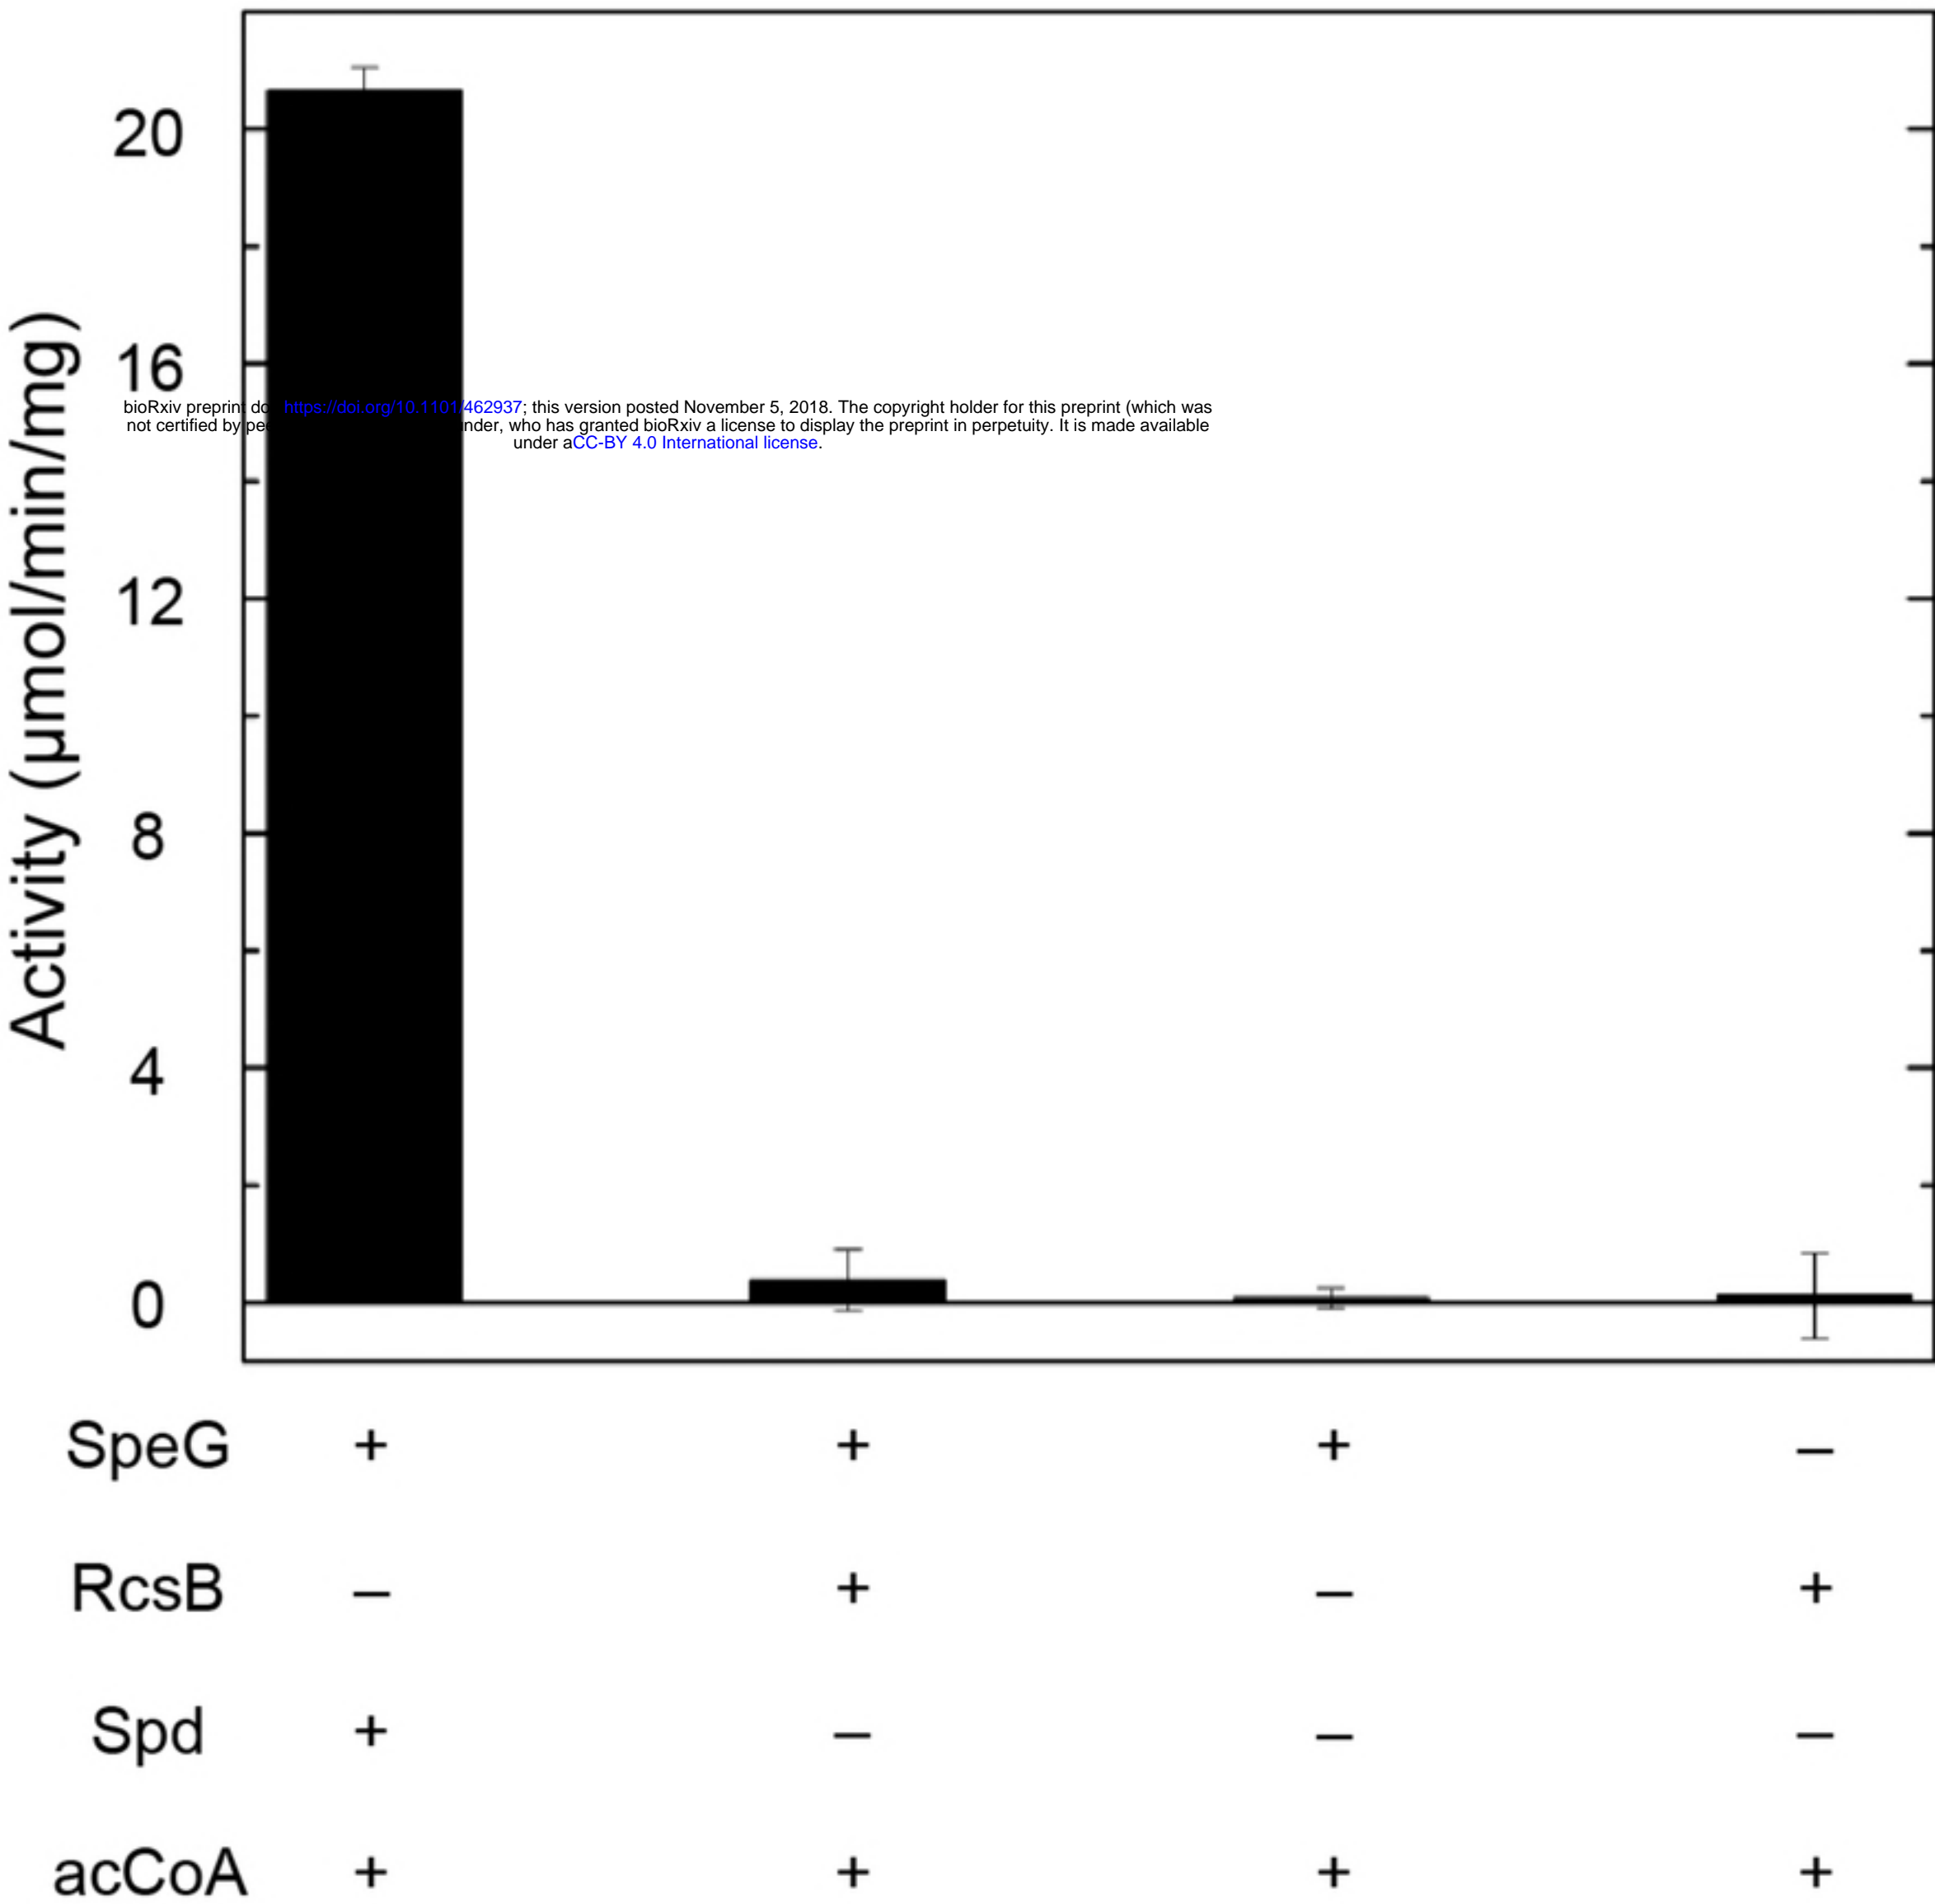

Fig2



bioRxiv preprint doi: <https://doi.org/10.1101/462937>; this version posted November 5, 2018. The copyright holder for this preprint (which was not certified by peer review) is the author/funder, who has granted bioRxiv a license to display the preprint in perpetuity. It is made available under aCC-BY 4.0 International license.

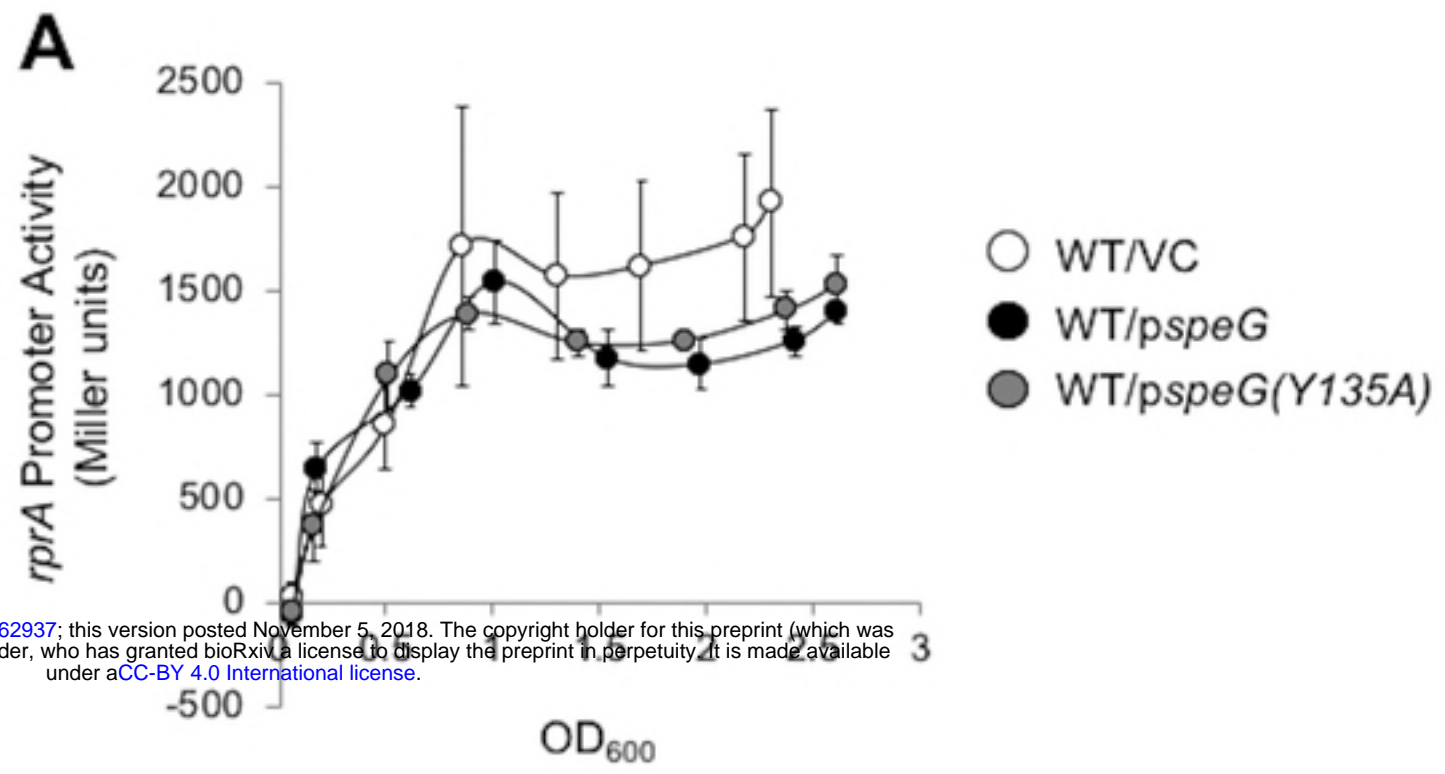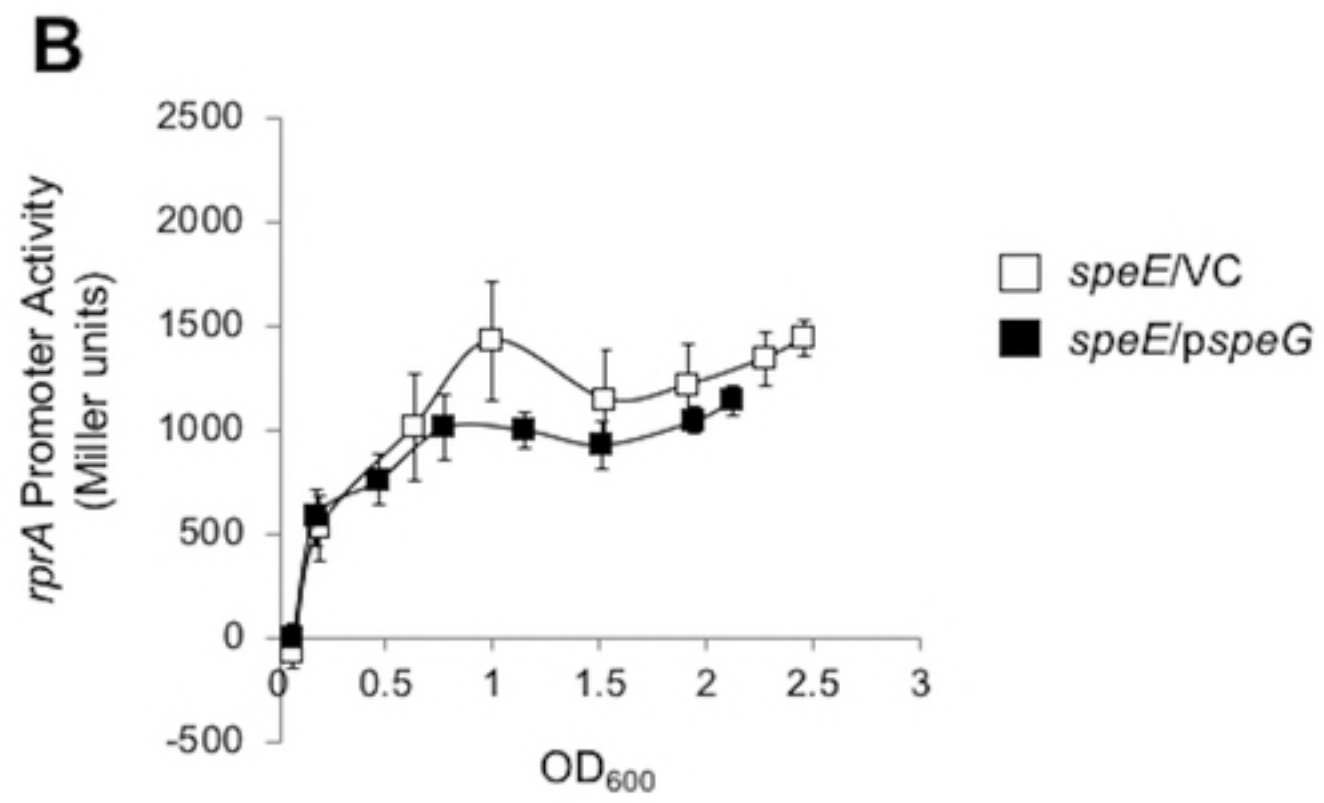

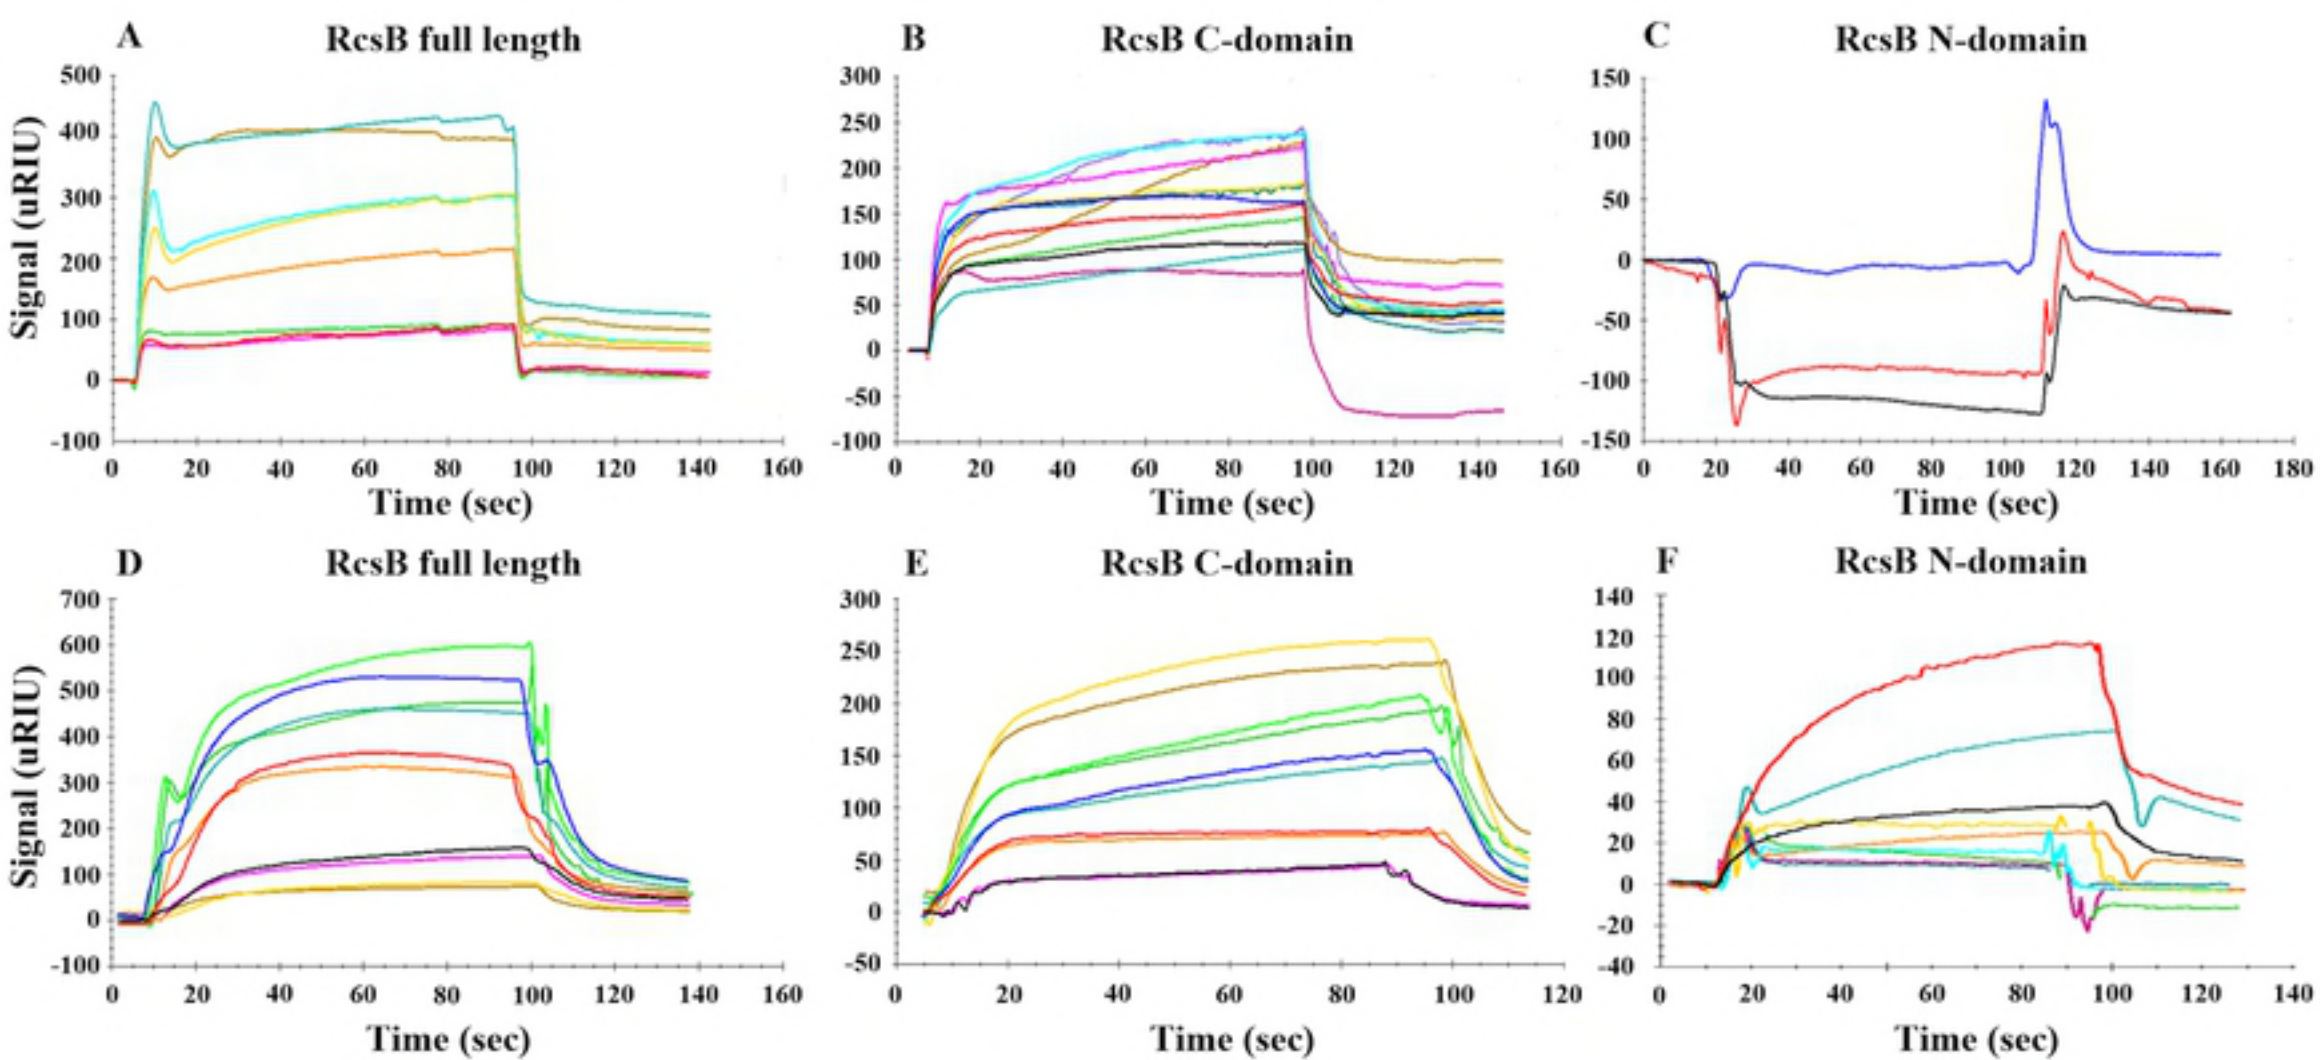

Fig4

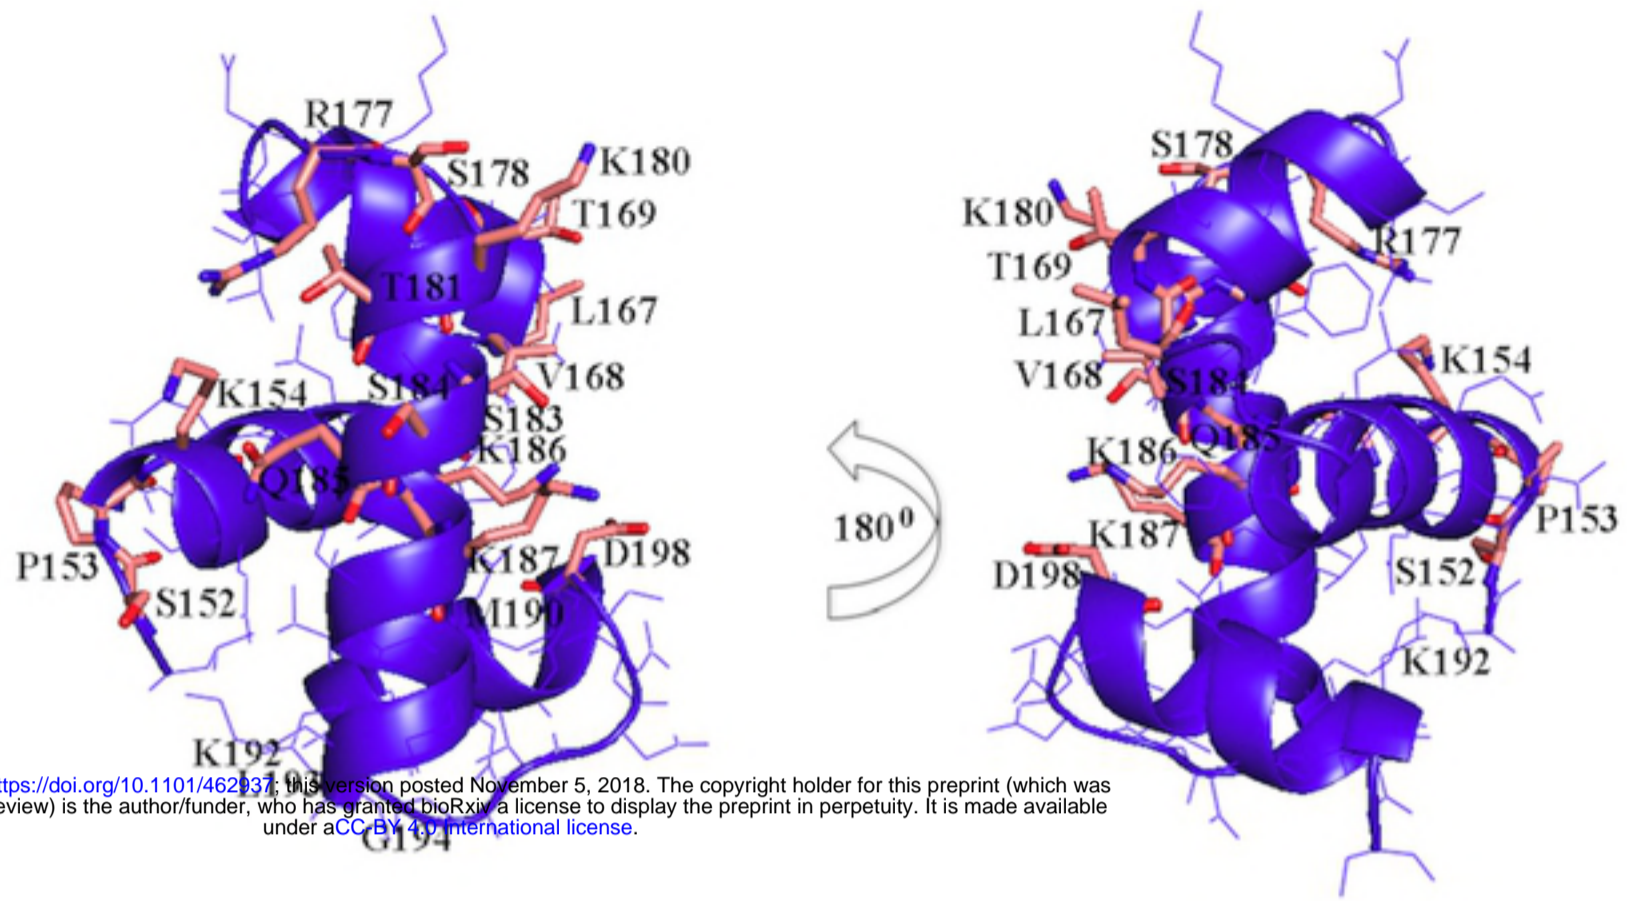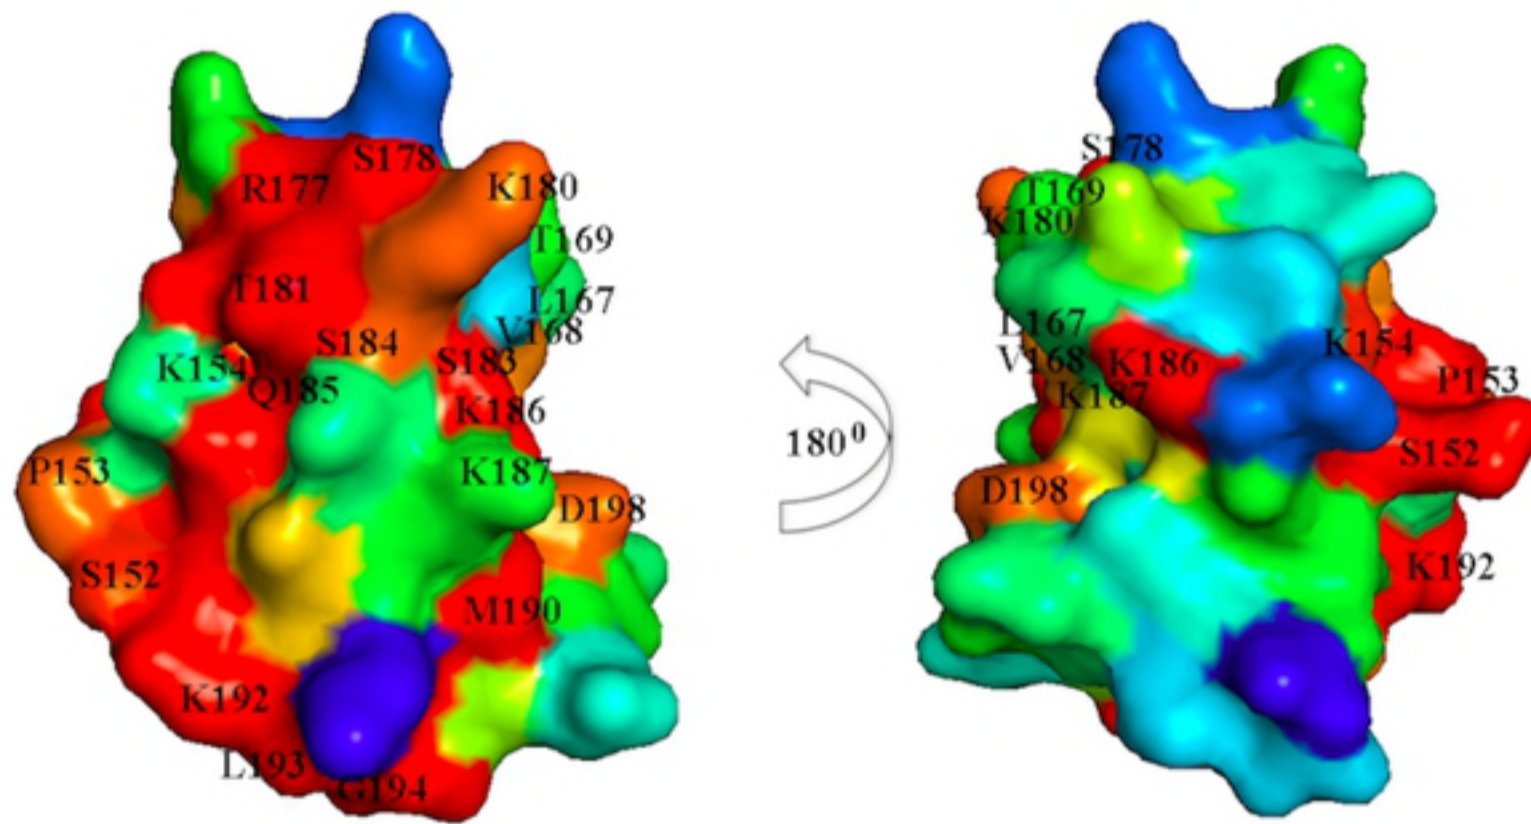

Fig5
